# Supplementary material
Source: PubMed Central journal article supplement (PMC3000943)
Supplement: supp_M110.140467_jbc.M110.140467-1.pdf [file supp_M110.140467_jbc.M110.140467-1.pdf]

## Supplemental data

### Methods

#### *Culture of Drosophila S2 cells*

*Drosophila* S2 cells were cultured at 24°C in 1x Schneider's *Drosophila* medium (Gibco/BRL), supplemented with 10% fetal bovine serum (heat-inactivated) and 1% Penicillin/Streptomycin (Invitrogen).

For transfections for luciferase assays,  $1.3 \times 10^6$  cells per well (in 0.65 ml) were plated in 24-well plates. Cellfectin (Invitrogen) was diluted 1:5 in serum-free medium to a final volume of 21  $\mu$ l and incubated for 45' at room temperature, then mixed with 21  $\mu$ l of serum-free medium containing the appropriate plasmids and dsRNA, incubated for another 15' at room temperature and finally diluted into 378  $\mu$ l serum-free medium and added to the washed cells; 16 h later, the transfection mix was replaced by complete medium and the incubation was continued for the indicated duration of time (typically 48 hours). Each plasmid solution typically contained 650 ng of each of the wt-RLuc and  $\Delta$ E-FLuc reporters, 130 ng tubulin-RLuc (where needed), and 40 ng dsRNA (where needed); for overexpressions a total of 1.3  $\mu$ g DNA (consisting typically of a 1:1 mix of the "driver" plasmid tub-GAL4 on one side, and the different UAS-cDNA plasmids on the other side) was added to each well. ; where indicated, dsRNA was added at 40 ng/ $10^6$  cells.

For samples to be analysed by Western blotting or immunoprecipitations,  $5 \times 10^6$  cells (in 1 ml) were plated per well into 6-well plates; transfections were done in a final volume of 1 ml containing 10  $\mu$ l Cellfectin and a total amount of 10  $\mu$ g plasmid DNA (3.3  $\mu$ g tub-GAL4, and 3.3  $\mu$ g of each expression plasmid, or pCaSper4 to bring the total DNA mass to 10  $\mu$ g). Cells were typically harvested 48 hours after transfection.

For qRT-PCR analysis of RNAi-treated cells,  $5 \times 10^6$  cells were plated in each well of a 6-well plate and incubated with 10  $\mu$ g dsRNA in 1 ml serum-free medium for 30'. Two ml of complete medium were then added and the cells harvested after the indicated incubation periods.

#### *Analysis of target gene expression.*

Luciferase assays: cells were harvested typically 48 h after transfection, washed in 1x PBS and lysed for 15' in 100  $\mu$ l 1x Passive Lysis Buffer (Dual-Luciferase Reporter Assay System, Promega). Ten  $\mu$ l of each lysate was transferred to luminometric 96 well plates (Greiner) and relative reporter gene expression was determined on a Wallac luminometer. The luminometer protocol was adjusted to disperse 50  $\mu$ l of each luciferase substrate per measurement. Each transfection was performed in duplicate, and all values are indicated as averages of duplicates with standard deviations.

qRT-PCR: cells were flushed off the plates at the indicated times after transfection, lysed in 1 ml Trizol reagent (Invitrogen) and total RNA was extracted and purified according to the manufacturer's protocol. After precipitation, RNA was redissolved in 20  $\mu$ l RNase-free water and 10  $\mu$ g of RNA were subjected to a DNase digestion (Ambion TURBO DNA-free-kit). The quality of the purified RNA was confirmed on Bioanalyzer Nano 6000 chips (Agilent). cDNA was synthesised starting with 1  $\mu$ g template RNA using the Omniscript Reverse Transcription Kit (Qiagen) and random hexamer primers; as control 1  $\mu$ g of template RNA was mock reverse-transcribed. qRT-PCR reactions were performed on an ABI 7900 Real Time PCR Instrument (Applied Biosystems) using the SYBR GREEN PCR Master Mix (Applied Biosystems), and data were analysed with SDS

## Supplement “Myc and dHCF”

2.0 software (Applied Biosystems) and Microsoft Excel, using the  $\Delta\Delta\text{Ct}$  method. Expression levels of actin5C and Sec24 served as internal references. Primers are listed below.

### *Protein analysis.*

**Western blot:** cells were harvested at the indicated time points and washed with 1x PBS, lysed in Laemmli sample buffer by boiling for 5' at 95°C and analysed by SDS-PAGE and immunoblotting, using the Enhanced Chemiluminescence kit (Amersham) or fluorescently labeled secondary antibodies. Blots were then either exposed to X-ray films, scanned with a CCD camera (Fuji LAS-3000), or analysed with an Odyssey reader (Li-Cor Biosciences).

***In vitro* interactions:**  $^{35}\text{S}$ -methionine labeled proteins were *in vitro* synthesized using the TNT Coupled Reticulocyte Lysate Transcription/Translation kit (Promega) according to the manufacturer's instructions and pRSetB-Myc<sup>wt</sup>, pRSetB-Myc <sup>$\Delta\text{HBM}$</sup> , pRSetB-dHCF-N<sup>wt</sup> or pRSetB-dHCF-N<sup>PS</sup> as templates. GST-fusion proteins were purified from bacteria according to standard protocols (31; detailed protocol available on request). Equal amounts of bead-coupled GST-fusions were pre-incubated for 2 h in GST Binding Buffer (20 mM Tris-HCl pH 8.0, 200 mM NaCl, 1 mM EDTA, 1 mM DTT, 0.5% NP-40, 10% glycerol, 1% BSA, protease inhibitors), followed by a 2 h incubation at 4°C with  $^{35}\text{S}$ -labelled protein, five washes in GST Wash Buffer (20 mM Tris-HCl, 200 mM NaCl, 1 mM EDTA, 1 mM DTT, 0.5% NP-40), analysis by SDS-PAGE (gels were stained with Coomassie Blue to document the amounts of GST-fusion proteins) and autoradiography or exposure to a Phosphorimager screen (Fujifilm FLA-7000).

**Immunoprecipitations from S2 cells:** 48 hours after transfection, cells were washed once with ice-cold PBS and lysed on ice for 30 minutes in lysis buffer (250 mM NaCl, 50 mM Tris-HCl pH 8.0, 5 mM EDTA pH 8.0, 0.5% Nonidet P-40) containing protease inhibitors (Protease Inhibitor cocktail tablets, Roche). Lysates were centrifuged (10', 13'000 rpm, microfuge) and the supernatants precleared for 1 h at 4°C with protein G Sepharose beads (GE Healthcare), followed by a 3 h incubation with anti-T7 antibodies (0.2  $\mu\text{l}$ ) and subsequent 1 hour incubation with protein G Sepharose beads. Beads were washed in Lysis Buffer (3x) and analysed by SDS-PAGE and Western blotting. For the experiment shown in Sup. Fig. 4C, cells were lysed 72 h after transfection and the cleared lysate was incubated for 4 h with 20  $\mu\text{l}$  anti-HA-beads (mouse monoclonal anti-HA-agarose; Sigma), or for 3 h with 200  $\mu\text{l}$  mouse anti-Myc supernatant, followed by a 1 h incubation with protein G sepharose beads.

### *LacZ assays*

Flies were grown under non-crowding conditions; one wandering larva was transferred to an Eppendorf tube and lysed by repeated (3-4x) freezing in liquid nitrogen (for 3-5'), and thawing in a 37° waterbath (for 3-5'), followed by manual homogenization in 100  $\mu\text{l}$  Z-buffer (60 mM Na<sub>2</sub>HPO<sub>4</sub>, 40 mM NaH<sub>2</sub>PO<sub>4</sub>, 10 mM KCl, 1 mM MgSO<sub>4</sub>). The color reaction was started by mixing the larval lysate with 700  $\mu\text{l}$  Z-buffer (containing 0.3%  $\beta$ -mercaptoethanol) and 160  $\mu\text{l}$  ortho-Nitrophenyl- $\beta$ -galactoside (0.4% in Z-buffer), incubated for the indicated durations at 30°, and stopped by the addition of 400  $\mu\text{l}$  1 M Na<sub>2</sub>CO<sub>3</sub>. Upon 10' centrifugation the supernatant was

### *Oligonucleotides used for synthesis of dsRNA*

Each primer contains a T7 promoter sequence at its 5' end (5'-TAATACGACTCACTATAGGGAGA; not shown below).

Myc: 5'-CCGGCTCTGATAG & 5'-TGCTCATCATGGA

GFP: 5'-TGAGCAAGGGCGAGG & 5'-GCGGCGGTCACGAAC

Supplement "Myc and dHCF"

Luc: 5'-AATCATAGTTTGGGCATCGC-3' & 5'-CAAAGGAGCTCCACCAGAAG-3'  
Hcf2: 5'-GACAGTGCCTGGAAGT & 5'-TTTTCTGGCACTCAGC  
Hcf3: 5'-GAGAGCCCAAACCTATAG & 5'-GAAAGATCCTTAAACACACC  
Atac1: 5'-GTAATGGAAATAGCAGAGATATCTG & 5'-ACTTCTGGACACGACTATACACTTG  
Atac2: 5'-CCAAAGATACAAACACAACCTTCAC & 5'-ATCTTGCATTATCTCTTCTAGTGGT  
D12: 5'-ACAACCTGTTGGACAGACTACGCTAT & 5'-GCACATAGACCAACCACTTATAGGT  
CG10238: 5'-GACAGTGGAAAGTTCCTACTGAAATT & 5'-CTATAACTACACTGGCTTCGCATAC  
CG30390: 5'-GTTTTTCATTGCGTAGGTAAACAAAG & 5'-CTCCTCATCAATTCCCTTAGCTAAT  
Ash2(2): 5'-CCAGTTCCGATATTACGGCCAATGT & 5'-GTCACCGCCAACCGATCCTCGCTT  
(primers "Ash2(1)" are derived from the Eurogentec collection and listed in Sup. Table 1)  
Mnn1: 5'-GGCTGTATAAGAAGTTCCAGACGAT & 5'-GATATACGTGATGGTTCCGATAGTG  
wds: 5'-CCGCTGATAAACTAATCAAATCTG & 5'-CTTCTCATTCTTGTGACCCGTATAC  
CG5585: 5'-CAAAAATGAATTTGGAGCTACTAGG & 5'-AAGGTTTCAACATCCAGTACGAGTA  
CG6444: 5'-TTGTTGGACTGCTGCAAAGACGCCA & 5'-TTAGGAGTTGTTGTCCACGGCGGCG

The remaining oligonucleotides were part of a library purchased from Eurogentec, whereby short gene-specific oligonucleotides, containing tags at their 5' ends, are used to generate a primary PCR product that is then re-amplified with tag-specific oligonucleotides. All "R oligonucleotides" contain the same tag (5'- TGGCGCCCCTAGATG), whereas the "S oligonucleotides" contain one of 9 different tags (Table S1).

*Oligonucleotides used for generating pWIZ-hcf plasmids*

pWIZ-hcf2: MB\_XbaHCF\_f2: 5'-TACATCTAGAGACAGTGCCTGGAAGT; MB\_XbaHCF\_r2: 5'-CCGATCTAGATTTTCTGGCACTCAGC  
pWIZ-hcf3: MB\_XbaHCF\_f3: 5'-AGCATCTAGAGCCCAAACCTATA; MB\_XbaHCF\_r3: 5'-GCAATCTAGAGAAAGATCCTTAAACACACC

*Oligonucleotides used for expression analysis quantitative real-time PCR*

*actin5C*: PG\_act5C\_F1: 5'-GCCCATCTACGAGGGTTATGC; PG\_act5C\_R1: 5'-AATCGCGACCAGCCAGATC  
*Sec24*: Sec24forw: 5'-CCACTCCCCTGCCATCCT; Sec24rev: 5'-ACCCCAAACCCAGCAACA  
*myc*: dmyc\_RTPCR\_f: 5'-GAATCGCGCTCGGTTAGTG; dmyc\_RTPCR\_r: 5'-CTACGCCGCGCTTTAAG  
*nnp1*: PG\_nnp1\_F1: 5'-CTATACACACGAAAGTTTCCATGCTATA; PG\_nnp1\_R1: 5'-CCCTTGCTCTTGGAGAATGG  
*CG5033*: PG\_CG5033\_F1: 5'-TAACCGCTCGGCTTTAATTCA; PG\_CG5033\_R1: 5'-CCCTTGCTCTTGGAGAATGG  
*CG12295*: CG12295\_RTPCR\_f: 5'-GGCGGAAGATGGATTTAGCTT; CG12295\_RTPCR\_r: 5'-CCTCGATTGCCCTTCGTATATAA  
*fibrillarlin*: fib.Left: 5'-ACGACAGTCTCGCATGTGTC; fib.Right: 5'-ATGCGGTA CTTGTGTGGATG  
*hcf*: MF\_HCF\_qPCR\_f: 5'-AATTCTTGGCGACGAGGAGAA; MF\_HCF\_qPCR\_r: 5'-CCCTCCTTGACATCCTTGAA  
*5sRNA*: 5sRNA\_fw: 5'-CGTCCGATCACCGAAATTAAG; 5sRNA\_rev: 5'-CCAAGCGGTCCCTCATCTAA  
*snoRNA U3*: PG\_U3\_f: 5'-TTTCACACTAGCTGAAAGCCAAGT; PG\_U3\_r: 5'-CCTCACGCTGCCGAATAGAA

Supplement "Myc and dHCF"

*tRNA(Leu)*: tRNA<sup>Leu</sup>.L: 5'-TAAGGCGCCAGACTCAAGAT; tRNA<sup>Leu</sup>.R: 5'-CCTCAAAGAGGACCAGAAC

transferred into 96-well luminometer plates and the absorption at 420 nm was determined.

*Oligonucleotides used for ChIP quantitative real-time PCR*

*Pka-C1* coding: chr2L\_P0\_Fw: 5'-CATGACACGGCCAAAGGAGC-3'; chr2L\_P0\_Rv: 5'-GGACAAGTGGCGACGCAATC-3'  
*Pka-C1*: chr2L\_P2\_Fw: 5'-TGTGAGTAGGCCAGCGATAG-3'; chr2L\_P2\_Rv: 5'-GAATAGAACCCGCGCAGTAG-3'  
*Hoip*: chr2L\_P3\_Fw: 5'-TTTAAGCTAGGGCTGCAGAG-3'; chr2L\_P3\_Rv: 5'-CGCAGGTGGTTCGGAAATAC-3'  
*CG4364*: chr2L\_P7\_Fw: 5'-CTTCTTGGGTCTCTCATTG-3'; chr2L\_P7\_Rv: 5'-ACTTCCTTTCCACGCGAAAC-3'  
*Nop5*: nop5\_dHCF\_p\_Fw: 5'-CAGCCAGCAGCAACTTAACC-3'; nop5\_dHCF\_p\_Rv: 5'-TGTTATGCGCGAACCAAGTG-3'  
*CG5033*: CG5033\_dHCF\_p\_Fw: 5'-ACCGATTACCAGCAGCAGTG-3'; CG5033\_dHCF\_p\_Rv: 5'-CGTGTTCAGTCAGCGATAG-3'

*Myc protein mutants used for Fig. S4D*

The expression plasmids coding for the indicated Myc mutants have been described in Steiger et al. (2008) and Schwinkendorf et al. (2009), except for HA-Myc<sup>C</sup>: this protein contains the HA-tag followed by Myc amino acids 1 to 625, i.e. it lacks the C-terminal BHLHZ domain of Myc.

*Drosophila genotypes shown in the figures:*

(the symbol ">" represents an FRT-site)

Fig. 2A

- y w; GMR-GAL4/UAS-lacZ[B-4-1-2]
- y w; GMR-GAL4/UAS-T7-dHCF-FLAG
- y w; GMR-GAL4 UAS-Myc[132]/UAS-lacZ[B-4-1-2]
- y w; GMR-GAL4 UAS-Myc[132]/UAS-T7-dHCF-FLAG

Fig. 2B

- y w hs-FLP; UAS-lacZ[B-4-1-2]/+; act>CD2>GAL4 UAS-GFP/+
- y w hs-FLP; UAS-T7-dHCF-FLAG /+; act>CD2>GAL4 UAS-GFP/+
- y w hs-FLP; UAS-lacZ[B-4-1-2]/UAS-Myc[132]; act>CD2>GAL4 UAS-GFP/+
- y w hs-FLP; UAS-T7-dHCF-FLAG/UAS-Myc[132]; act>CD2>GAL4 UAS-GFP/+

Fig. 3A

- y w; sca-GAL4/UAS-lacZ-IR
- y w; sca-GAL4/+; UAS-hcf-IR 3.1/+
- y w; sca-GAL4/UAS-hcf-IR 2.9

Fig. 3B

- y w; ap-GAL4 UAS-Myc[132]/UAS-LacZ-IR<sup>M3-1</sup>
- y w; ap-GAL4 UAS-Myc[132]/+; UAS-hcf-IR VDRC/+
- y w; ap-GAL4 UAS-Myc[132]/+; UAS-hcf-IR 3.1/+

Fig. 3C

- y w hs-FLP; UAS-lacZ[B-4-1-2]/+; act>CD2>GAL4 UAS-GFP/+

## Supplement “Myc and dHCF”

- y w hs-FLP; UAS-hcf-IR 2.42/+; act>CD2>GAL4 UAS-GFP/+
- y w hs-FLP; +; act>CD2>GAL4 UAS-GFP/UAS-hcf-IR 3.1
- y w hs-FLP; UAS-lacZ[B-4-1-2]/UAS-Myc[132]; act>CD2>GAL4 UAS-GFP/+
- y w hs-FLP; UAS-hcf-IR 2.42/UAS-Myc[132]; act>CD2>GAL4 UAS-GFP/+
- y w hs-FLP; UAS-Myc[132]/+; act>CD2>GAL4 UAS-GFP/UAS-hcf-IR 3.1

### Fig. 3D

- y w tub>Myc>GAL4 ey-flp/+; UAS-lacZ-IR
- y w tub>Myc>GAL4 ey-flp/+; UAS-hcf-IR 2.9
- y w tub>Myc>GAL4 ey-flp/+;+; UAS-hcf-IR 3.1/+
- y w tub>Myc>GAL4 ey-flp/+;+; UAS-hcf-IR VDRC/+
- y w dm<sup>P0</sup> tub>Myc>GAL4 ey-flp/+; UAS-lacZ-IR
- y w dm<sup>P0</sup> tub>Myc>GAL4 ey-flp/+; UAS-hcf-IR 2.9
- y w dm<sup>P0</sup> tub>Myc>GAL4 ey-flp/+;+; UAS-hcf-IR 3.1/+
- y w dm<sup>P0</sup> tub>Myc>GAL4 ey-flp/+;+; UAS-hcf-IR VDRC/+

### Fig 6B

- (y) w; ap-GAL4 UAS-Myc[132]/UAS-lacZ-IR
- (y) w; ap-GAL4 UAS-Myc[132]/UAS-Ash2-IR
- (y) w; ap-GAL4 UAS-Myc[132]/+ ; UAS-Gcn5-IR(T2)/+

### Fig. S2 - LacZ assays:

- blank: buffer alone (no fly)
- control: (y)w; ap-GAL4/CyO,y+ x yw
- LacZ1: (y)w; ap-GAL4/CyO,y+ x yw ; UAS-lacZ[B-4-1-2] ; UAS-GFP
- LacZ1 hcf3: (y)w; ap-GAL4/CyO,y+ x yw; UAS-lacZ[B-4-1-2]/CyO,y+ ; UAS-HCF-IR 3.1/TM6B,Tb
- LacZ1 hcfV: (y)w; ap-GAL4/CyO,y+ x w; UAS-lacZ[B-4-1-2] ; UAS-HCF-IR VDRC/TM6B,Tb

### Fig. S3 – knockdown of dHCF in wing imaginal disc clones:

- y w hs-FLP; UAS-LacZ-IR<sup>M3-1</sup>/+; act>CD2>Gal4 UAS-GFP/+
- y w hs-FLP; UAS-hcf-IR 2.42/+; act>CD2>Gal4 UAS-GFP/+
- y w hs-FLP; +; act>CD2>Gal4 UAS-GFP/UAS-hcf-IR 3.1
- y w hs-FLP; UAS-Myc[132]/UAS-LacZ-IR<sup>M3-1</sup>; act>CD2>Gal4 UAS-GFP/+
- y w hs-FLP; UAS-Myc[132]/UAS-hcf-IR 2.42; act>CD2>Gal4 UAS-GFP/+
- y w hs-FLP; UAS-Myc[132]/+; act>CD2>Gal4 UAS-GFP/UAS-hcf-IR 3.1

## Figure legends

**Figure S1. Quantification of dHCF knock-down effects on endogenous Myc targets.** S2 cells were incubated with the indicated dsRNAs and RNA isolated 2 d later. Expression levels of the indicated genes were determined by quantitative real-time PCR, using actin 5C as an internal reference. Expression levels in cells treated with *gfp* dsRNA were set to 100 %, and error bars indicate standard deviations.

**Figure S2. Knock-down of dHCF *in vivo* does not reduce GAL4 activity.** For each time point the average of 3 larvae is shown ( $\pm$  standard deviation). Enzymatic activities (calculated from linear regression of the curves shown in the figure) are ( $\times 10^{-3}$   $\Delta$ OD<sub>420</sub>/min): 0.08 (blank - buffer alone), 0.50 (control - no LacZ-transgene), 6.6 (LacZ1 - no RNAi), 8.1 (LacZ1 + hcf3-RNAi), 8.1 (LacZ1 + hcfV-RNAi).

## Supplement "Myc and dHCF"

**Figure S3. Knock-down of dHCF *in vivo* impairs (Myc-dependent) growth.** Average area of wing imaginal disc clones that have been overexpressing Myc and/or dHCF-dsRNA for 45 h; n=50-80 per genotype; \*\* indicates  $p < 0.01$  as compared to the corresponding control.

**Figure S4. Physical interaction between dHCF and Myc *in vitro* and in S2 cells.** **A**, *in vitro* translated (IVT) Myc<sup>WT</sup> preferentially binds to GST-dHCF<sup>+</sup> (upper panel); GST-dHCF<sup>PS</sup> was expressed at lower levels in bacteria, so its binding affinity cannot be directly compared to that of GST-dHCF<sup>+</sup>. The lower panel shows a Coomassie Blue staining of the same gel. **B**, *in vitro* translated dHCF<sup>+</sup> and dHCF<sup>PS</sup> preferentially bind to GST-Myc<sup>WT</sup> and GST-Myc<sup>HBM</sup>. The percentages in panels A and B indicate the relative levels of bound IVT protein, as determined by exposure of the radioactive gels to a PhosphorImager. **C**, anti-HA-epitope antibodies precipitate T7-dHCF when it is co-expressed with HA-Myc, but not when expressed alone. Cells were transfected with T7-dHCF and/or HA-Myc<sup>WT</sup> (as indicated by a "+" above the lanes) and lysates precipitated with anti-T7 or anti-Myc antibodies. anti-T7-epitope antibodies precipitate HA-Myc<sup>WT</sup> and HA-Myc<sup>BHM</sup> when they are co-expressed with T7-dHCF, but not when expressed alone. Labels above the lane indicate the transfected proteins (T7-dHCF and/or HA-Myc<sup>WT/HBM</sup>). **D**, different Myc mutants still co-immunoprecipitate with dHCF. T7-tagged dHCF was co-expressed in S2 cells with the indicated HA-tagged Myc mutants, followed by cellular lysis and co-immunoprecipitation analysis as described in the main text. The last two lanes contain lysates from untransfected cells (last lane), or from cells expressing HA-Myc<sup>wt</sup> but no T7-dHCF (penultimate lane).

**Figure S5. Efficiency of dHCF and Myc depletion, respectively.** S2 cells were treated with the dsRNAs indicated above the lanes, exactly as for the ChIP experiments shown in Figs. 5B, C. Whole cell lysates were probed with the indicated antibodies, revealing efficient depletion of dHCF and Myc, respectively.

**Table S2. List of genes that were included in the tissue culture based RNAi screen.**

**Table S1.**

| FBgn    | Amplicon Length | R oligonucleotide                         | S oligonucleotide                     | S tag           | Tag Nr |
|---------|-----------------|-------------------------------------------|---------------------------------------|-----------------|--------|
| HCF     | 520             | TGGCGCCCCTAGATGCATTAATAGTATATTGCAAAGTTTC  | TGAGGTACGCGTGGGATGTGGGTTTGCAATTGATATG | TGAGGTACGCGTGGG | 3      |
| Ada2A   | 520             | TGGCGCCCCTAGATGTAGTCCGCGACAACATACA        | CGACGCCCGCTGATAGATTGTTGTATGCCCGAACTA  | CGACGCCCGCTGATA | 4      |
| Ada3    | 520             | TGGCGCCCCTAGATGCACTCTTCGATGACCATTCT       | CGCATGTAGCCTGCCAGGGACTCCTCCATTAAGG    | CGCATGTAGCCTGCC | 7      |
| GCN5    | 520             | TGGCGCCCCTAGATGAACTTTCTGAACCACTACAAC      | TAGGTCTAGCCCCGCTCGGTGGGCTCCTTTTTG     | TAGGTCTAGCCCCGC | 5      |
| CHRAC14 | 387             | TGGCGCCCCTAGATGCGCATCGAGGATCTTAACC        | AGCTAGCCCAGGTGAACTCGGGGGCTTCTCT       | AGCTAGCCCAGGTGA | 1      |
| CG32343 | 520             | TGGCGCCCCTAGATGGTGGTTCTTCTTAAGTACGTTAT    | AGCTAGCCCAGGTGAGACTTTTCTTTATATCGGTCCT | AGCTAGCCCAGGTGA | 1      |
| NC2b    | 520             | TGGCGCCCCTAGATGGACGACGAGCTGACCCT          | TAGGTCTAGCCCCGCCATCGTCATCGTCATCCTC    | TAGGTCTAGCCCCGC | 5      |
| Sin3A   | 520             | TGGCGCCCCTAGATGGAAATAATCATCATGTACAAAAGTAC | AGCTAGCCCAGGTGAAACCATCTCAGCAGGTGC     | AGCTAGCCCAGGTGA | 1      |
| ash2    | 381             | TGGCGCCCCTAGATGCCAAAAACAATCGACAGAAAAG     | TAGCCTCCCTAGCGCTGTGGCTCGGACCATGC      | TAGCCTCCCTAGCGC | 8      |
| CG40351 | 571             | TGGCGCCCCTAGATGGCAGGACGTTCCGGAATATC       | CGCATGTAGCCTGCCTCCATTACAGACTTTTGATTG  | CGCATGTAGCCTGCC | 7      |
| ash1    | 520             | TGGCGCCCCTAGATGACCTTTGTGGCCAGGACC         | TGACCCGGGTAGCCTGGCAGGCAAGGGATCGT      | TGACCCGGGTAGCCT | 2      |
| Trx     | 520             | TGGCGCCCCTAGATGTGACGGTTCACCTCAAATGT       | AGCTAGCCCAGGTGAATCCAGGGCTGTTAGGGTT    | AGCTAGCCCAGGTGA | 1      |
| trr     | 520             | TGGCGCCCCTAGATGCAGATGTCCGGACAAATCTC       | TAGCCTCCCTAGCGCCTTCTACCTTGAGAACTT     | TAGCCTCCCTAGCGC | 8      |

Figure S1

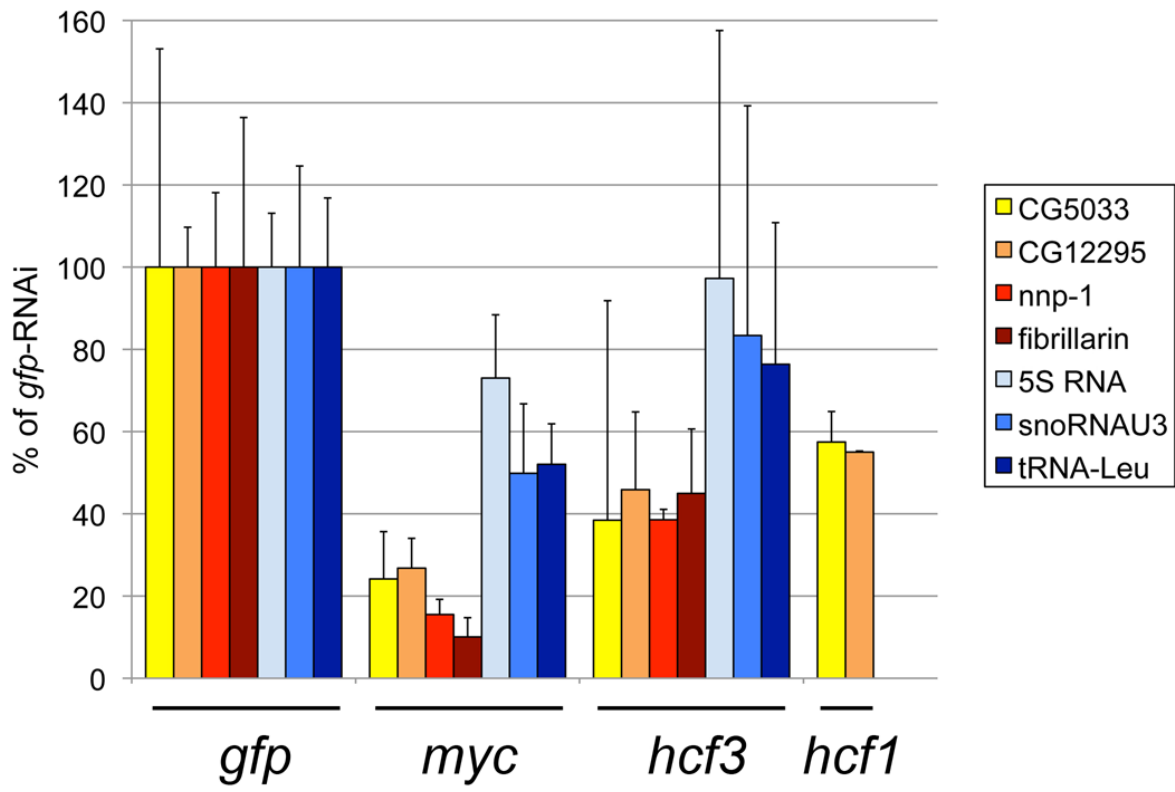



# Figure S2

---

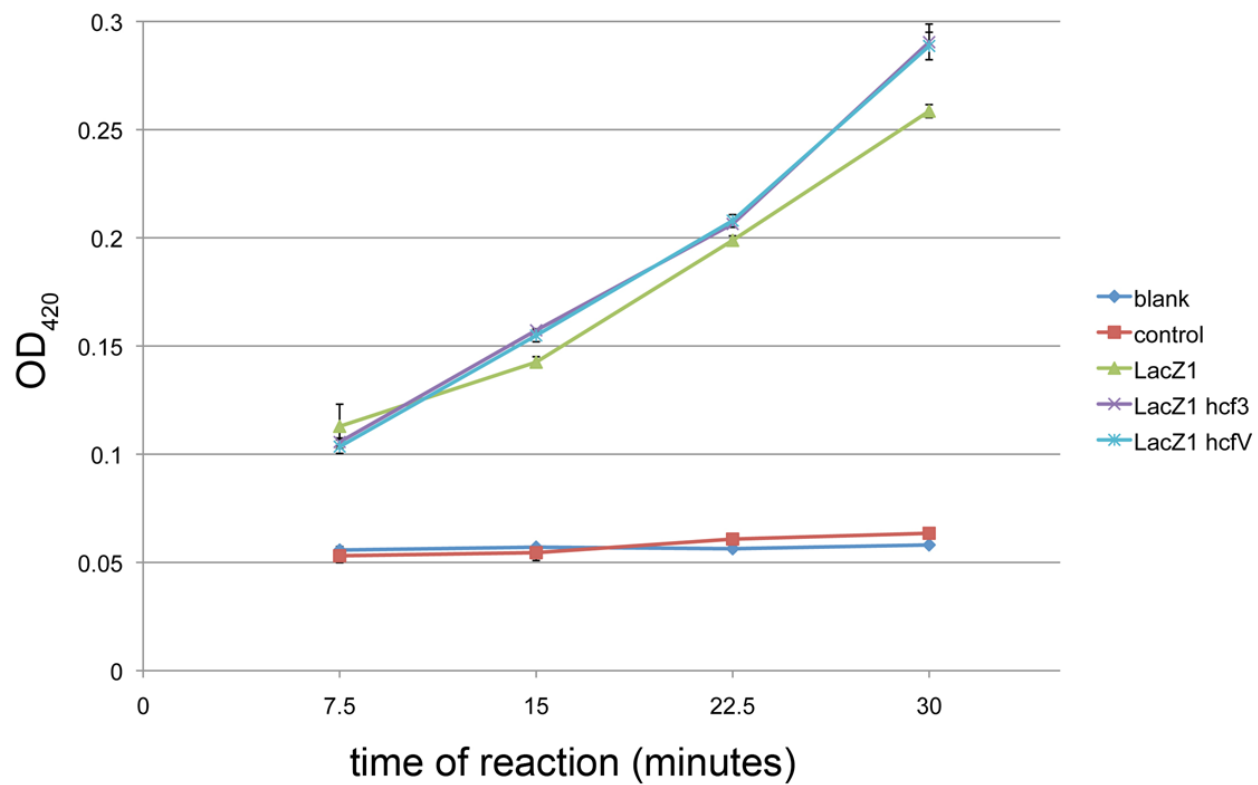

Figure S3

---

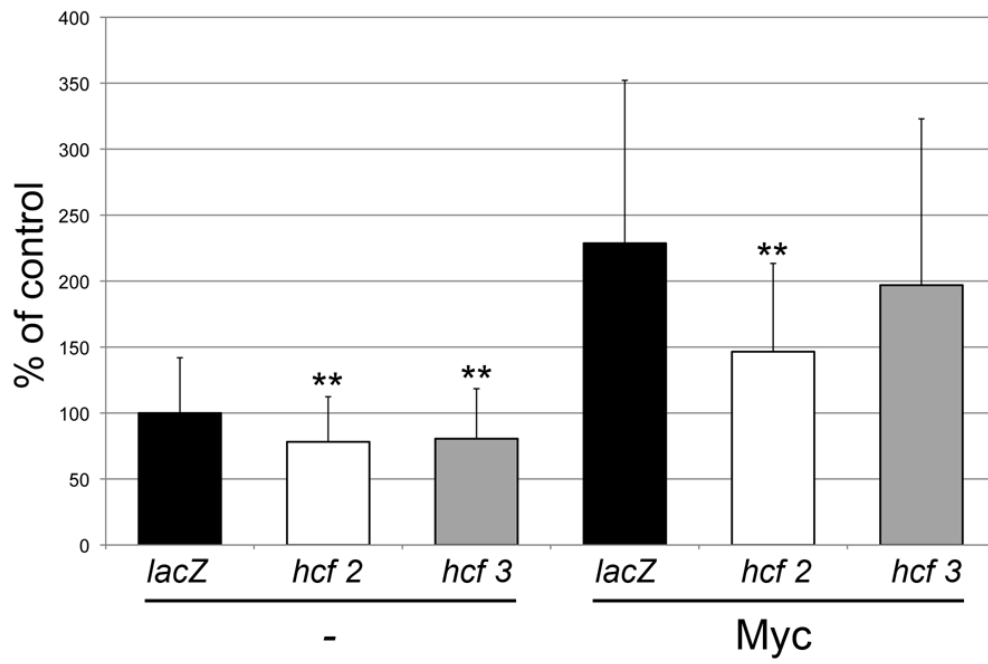

Figure S4

A

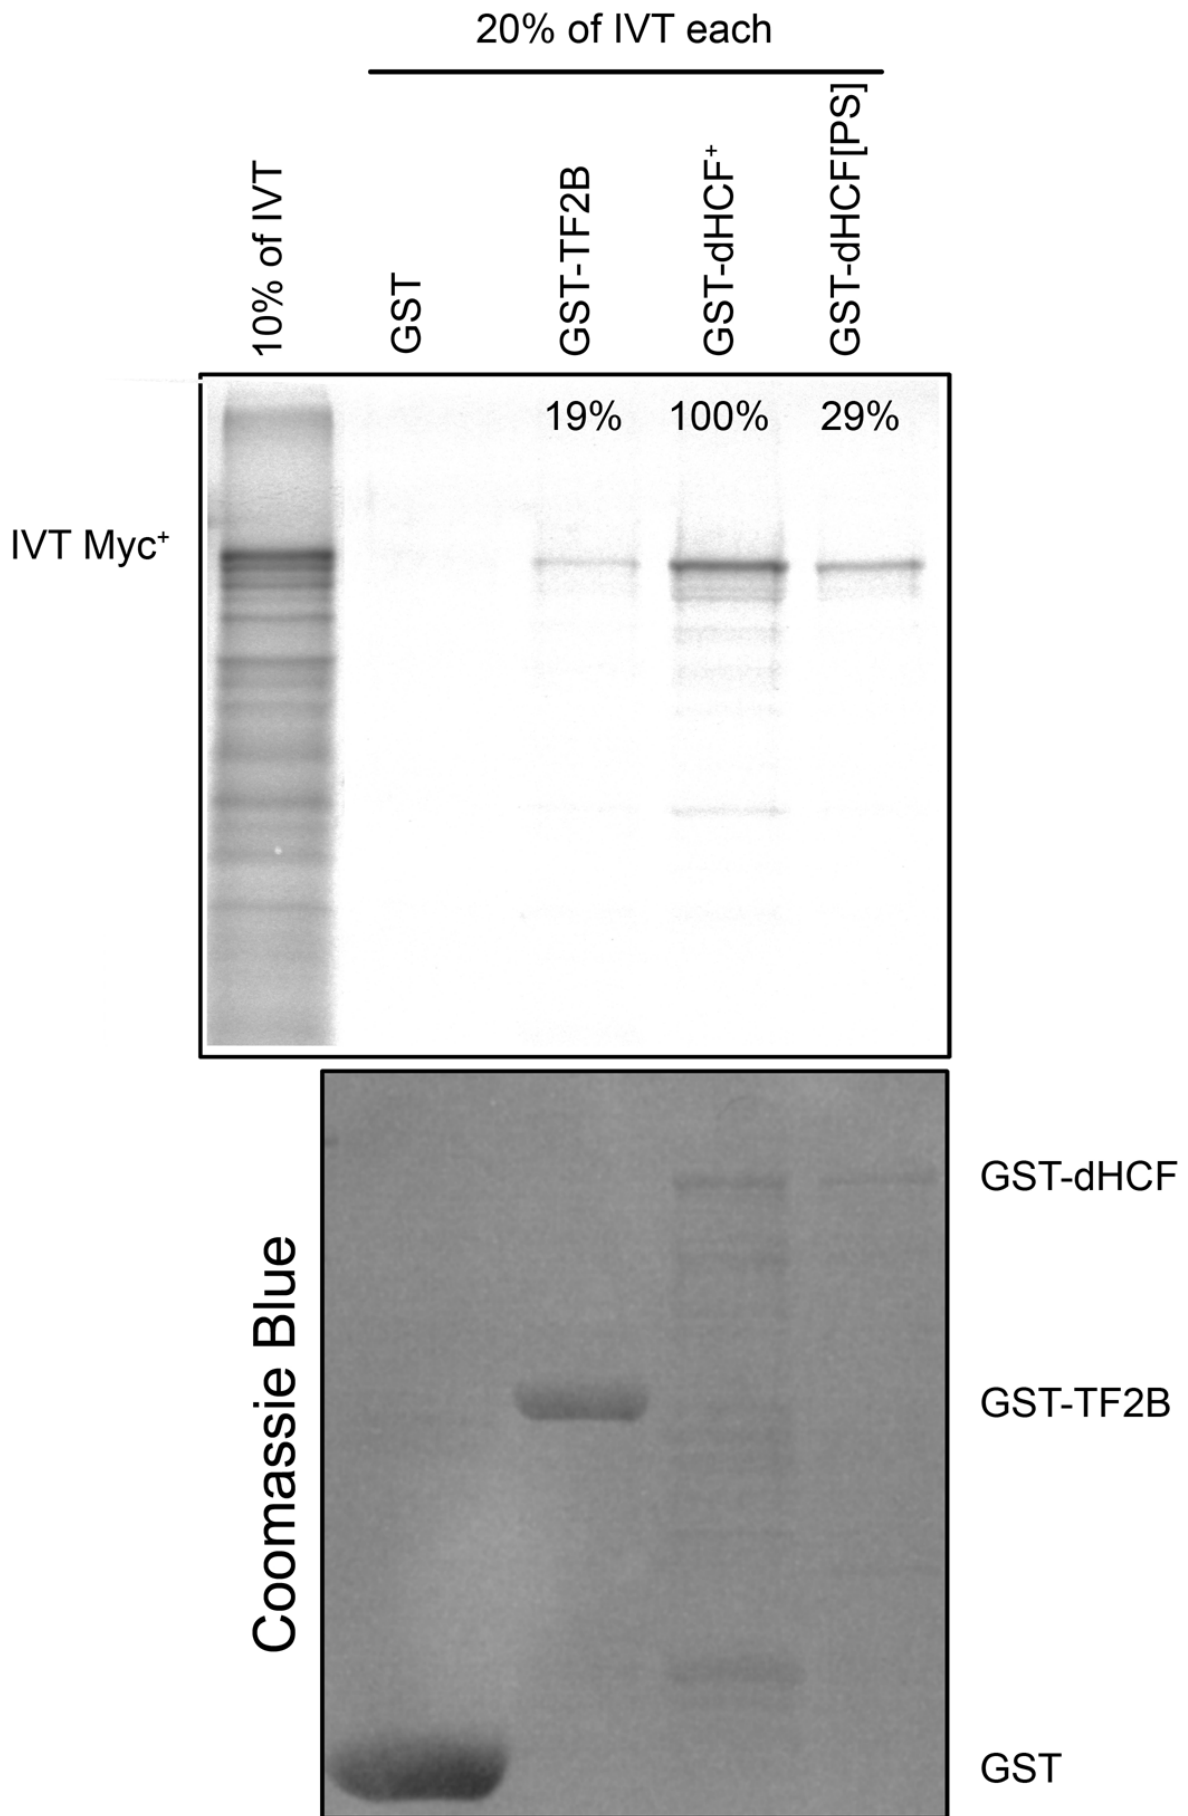

# Figure S4

## B

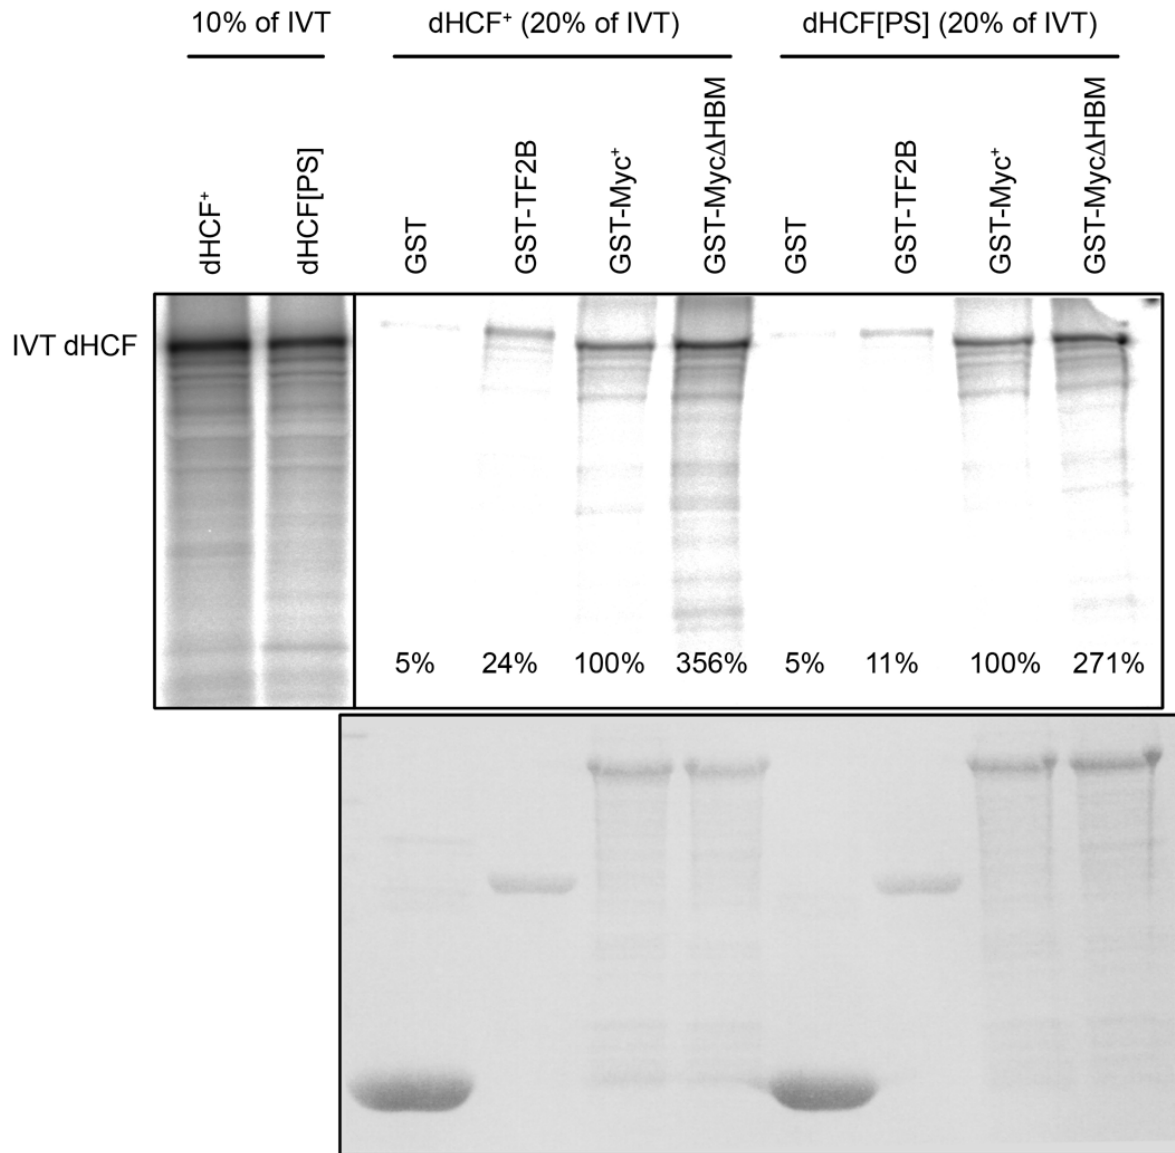

Figure S4

C

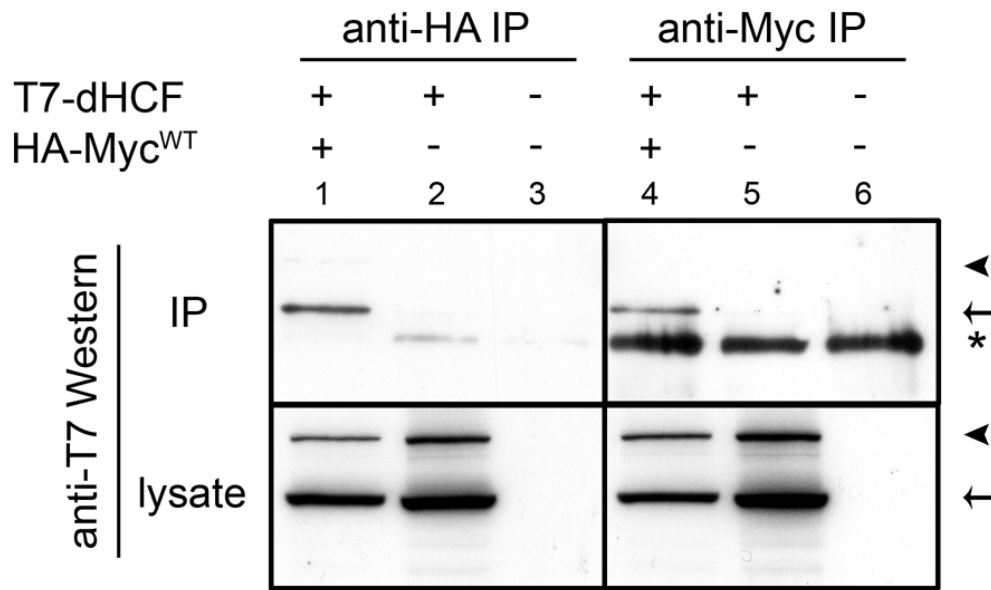

D

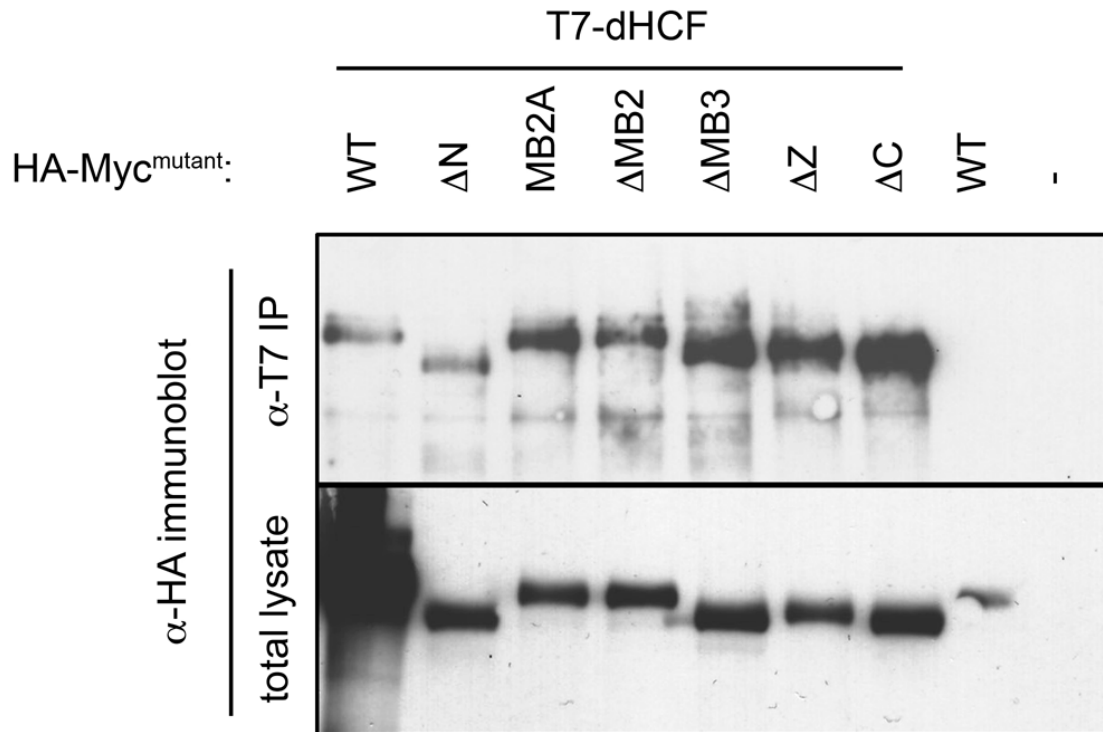

# Figure S5

---

A

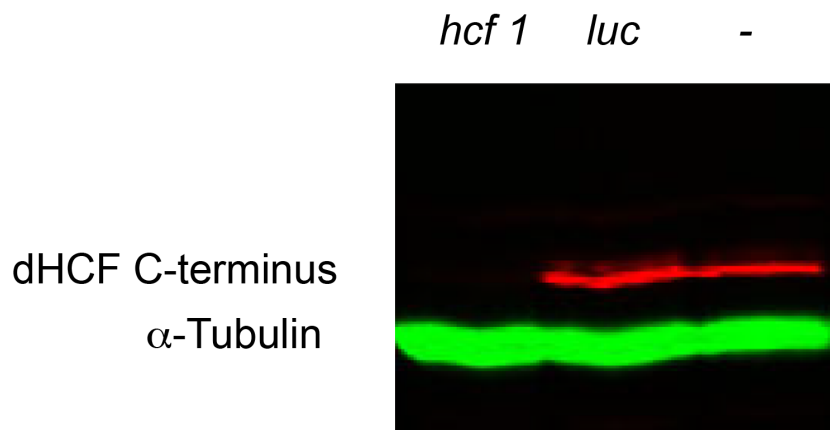

B

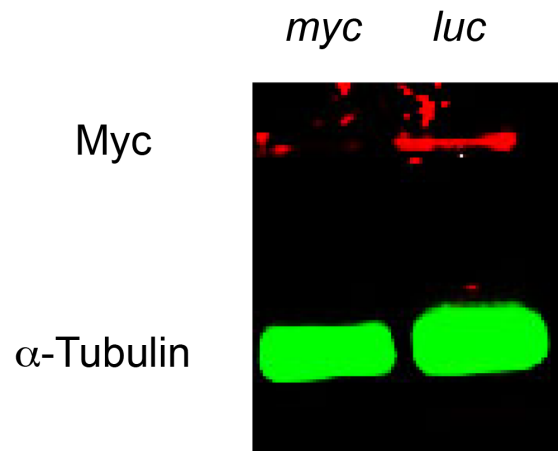

**Table S2 / 1**

| <b>Gene</b> | <b>Synonyms</b>                                                                                                                       |
|-------------|---------------------------------------------------------------------------------------------------------------------------------------|
| 14-3-3zeta  | 4-3-3 zeta; leo; 14-3-3zeta; 14-3-3zeta; CG17870; D14-3-3; 2G1; 549; I(2)07103; leonardo; 14-3-3; D14-3-3zeta; Leonardo-13-3-3; par-5 |
| abo         | abo; CG6093                                                                                                                           |
| ac          | ascT5; AS-C T5ac; Hairy wing; 990 E5 F1; CG3796; Ac; ac; ASC; EG:125H10.3; T5; achaete-scute; AS-C T5; sc/T5; Hw                      |
| Acf1        | Acf-1; CG1966; CHRAC; ACF; Acf; CAF; ACF1; Acf1; acf1; CHRAC-175; dCHRAC; p170/p185; dACF                                             |
| achi        | achintya; CG8819; zaa; achi                                                                                                           |
| acj6        | CG9151; I-POU; ACJ6; Acj6; acj6; lpou; tl-POU                                                                                         |
| Ada2A       | ADA2A; Ada2A; CG31318; dAda2A; CG7150                                                                                                 |
| Ada2S       | Ada2S; CG9638; BcDNA:LD24527; dAda2S                                                                                                  |
| Adf1        | I(2)01349; Adf-1; CG15845; nal; Adf 1; Adf1; adf1; I(2)04065; nalyot                                                                  |
| Aef1        | CG5683; AEF-1; Aef1                                                                                                                   |
| ago         | CG15010; ago; DmFbw7                                                                                                                  |
| alien       | BcDNA:LD10463; Alien; alien; DCH2; Dch2; d-Alien; CG9556; CH2; CSN2                                                                   |
| aly         | CG2075; ms(3)ry2; aly; ms(3)2                                                                                                         |
| Aly         | I(3)02267; Aly; BcDNA:LD24793; cg1101; CG1101; ref1; REF1; dmREF1; DmREF1                                                             |
| aop         | Aop; aop; yan/pok; pokkuri; DROYANET; Aop/Yan; aop/yan; yan; Yan; YAN; CG3166; pok; DROYANETSB; SK2-1                                 |
| AP-2        | AP-2; CG7807; DAP-2; dAP-2; stummelbein; dAP-2alpha                                                                                   |
| apt         | TDF/APT; apt; I(2)09049; I(2)k11531; I(2)03041; I(2)06369; 3041; tdf; TDF; CG5393                                                     |
| ara         | CG10571; iroquois-complex; Iro; iro; IRO-C; Iro-C; iro-C; iroquois                                                                    |
| Arc105      | dARC105; BcDNA:GH03922; Med9/ARC105; CG4184; Arc105                                                                                   |
| Arc32       | Med8/ARC32; CG30140; Arc32; CG13867; dARC32                                                                                           |
| Arc42       | CG4703; dARC42; Arc42                                                                                                                 |
| Arc92       | CG12254; Arc92; dARC92; LD07688                                                                                                       |
| ase         | AS-C T8; EG:165H7.2; sc/T8; ascT8; T1; T1a; ASC; AS-C T8ase; ase; T8; CG3258; AS-T8; as-T8                                            |
| asf1        | CG9383; ASF1; Asf1; asf1; dASF1                                                                                                       |
| ash1        | dash; I(3)SG29a; CG8887; ash-1; ash; ash1; Ash1; ASH1                                                                                 |
| ash2        | 291.8; mad; CG6677; I(3)SG65; 1124/11; 703; I(3)112411; ash-2; I(3)S112411; ash2; ASH2                                                |
| Asx         | CG8787; Asx                                                                                                                           |
| atms        | CG2503; antimeros; anon-WO0172774.113; anon-WO0172774.114; anon-WO0172774.116; I(3)01456; I(3)02466; I(3)rK509; Paf1; PAF1            |
| Atu         | CG1433; I(3)s1938; Another transcription unit                                                                                         |
| az2         | zf43C; az2; CG1605                                                                                                                    |
| Bap60       | i133; BAP60; Bap60; BAPp60; i127; CG4303                                                                                              |
| Bbbf1       | BBF-1; Bbbf1                                                                                                                          |
| bel         | DmRH6; I(3)85Ac; BEL; bel; cap; ms(3)Pneo85A; CG9748; cg9748; anon-85Ab; ms(3)neo30; L3; I(3)L3                                       |
| Bgb         | CG7959; rpbeta2; Bgb; bgb; Big-brother; en(lz)D/9                                                                                     |
| bgcn        | ben(2)gcn; fs(2)eo-C; PNBP; CG10330; CG10331; cg10331; CG30170; pep; fs(2)eo6; fs(2)eoQS2; gcn; bgcn; b(2)cgn; b(2)gcn                |

**Table S2 / 2**

|          |                                                                                                                                                                                        |
|----------|----------------------------------------------------------------------------------------------------------------------------------------------------------------------------------------|
| bi       | CG3578; Qd; T3; optomotor-blind; l(1)bi; BI; bi; optomotor blind; Optomotor blind; l(1)omb; dm-omb; Dm-omb; Dm-OMB; omb; Omb; OMB                                                      |
| bic      | l(2)49Da; E(Bic); l(2)k10712; 5A; E(2)Bic; BcDNA:GM05329; 107/12; l(2)vr22; CG3644; vr22; Btf; BcDNA.GM05329; bic; Bic                                                                 |
| BicD     | BicD; CG6605; Bicaudal-D; anon-EST:fe2A11; BIC-D; Bic-D; Bic<up>D</up>                                                                                                                 |
| Bin1     | dSAP18; dSap18; BcDNA:RE02417; CG6046; bin1/dSAP18; bin1; Bin1; SAP18                                                                                                                  |
| bip2     | TFIID; dBIP2; i163; CG2009; TAFII155; bip-II; TAF<down>II</down>155; BIP2; bip2; i31; TAF3; dTAF<down>II</down>155                                                                     |
| Bj1      | CG18640 (Bj1), RCC protein; RCC1; RanGEF; sdt; BJ1; Bj1; CG18640; CG10480                                                                                                              |
| Bka      | BcDNA:RE14949; l(2)02695; Bka; mip; CG4539                                                                                                                                             |
| bl       | CG13425; Hrb57A; l(2)k08305; Q18; bl; CG30153; l(2)05056                                                                                                                               |
| bon      | 0487/06; 0249/12; CG15687; 0241/08; bon; Bonus; CG5206                                                                                                                                 |
| bowl     | l(2)k08617; 17-29-5; l(2)c; Bowl; bowl; bowel; org2; Su(tor)2-1; CG10021                                                                                                               |
| brat     | l(2)brat; brat; Cf; l(2)37Cf; l(2)E60; anon-37CDa; Brain Tumor; E60; CG10719; fs(2)ltoPM43                                                                                             |
| Brf      | CG4155; BRF; Brf; BRF1; CG31256; CG5419                                                                                                                                                |
| brk      | CG9653; ssg-1; Brinker; Brk; brk                                                                                                                                                       |
| brm      | BRM; Brm; brm; CG18438; l(3)72Aa; dBRM; CG5942; E(E2F)3A                                                                                                                               |
| Bro      | CG7960; Bro; bro; Beta for Runt and OTHERs; rpbeta1                                                                                                                                    |
| bs       | Group IIc; ba; px; Srf; SRF; pruned/DSRF; pruned; DSRF; DSrf; dSRF; dsrf; Serf; l(2)03267; DSrf/bs; CG3411; BS; bs; Serum Response Factor; serum response factor; CG4444; DmSRF; D-SRF |
| bsh      | lambdaE86; Hox11-310; E86; Bsh; bsh; CG10604                                                                                                                                           |
| btb      | btb                                                                                                                                                                                    |
| BtbVII   | BtbVII; BTB protein VII; BTB-VII; CG11494                                                                                                                                              |
| btd      | BTD; btd; CG12653                                                                                                                                                                      |
| Bteb2    | CG2932; Bteb2                                                                                                                                                                          |
| bun      | l(2)rl043; bun; l(2)06475; short-sighted; l(2)02687; shortsighted; l(2)k02903; l(2)05479; CG5461; 1550; TSC-22; l(2)00255; EP(2)0488; Tsc22; shs                                       |
| Bx       | fliH; beadex/dLMO; Bd; Ptd; mgt; Lmo; Rho; hdp-a; DLMO; Dlmo; dLMO; dlmo; rhombotin; dttg; CG6500; hld; Bx; mgg; hdp                                                                   |
| byn      | DTrg; apro; Dm-BYN; Tra; D-TRA; Byn; byn; CG7260; byn/apro; dm-Trg; trg; Trg; D-Trg                                                                                                    |
| C15      | C15; Ect5; 93Bal; Hox11-311; CG7937; 311                                                                                                                                               |
| cact     | BG:DS02740.15; cact; CG5848; dip6; cac; fs(2)ltoRN48; n(2)k17003                                                                                                                       |
| cad      | 38E.19; Cad; cad; CG1759; S67; cd                                                                                                                                                      |
| Caf1     | NURF-55; Nurf-55; NURF55; dCAF-1 p55; CAF-1; Caf-1; CG4236; 55; p55; CAF1; Caf1; p55/NURF-55; NURF; d-CAF1; dCAF-1; dNURF                                                              |
| Caf1-105 | CG12892; Caf1-10; Caf1-105                                                                                                                                                             |
| Caf1-180 | Caf1-180; CG12109                                                                                                                                                                      |
| can      | can; CG6577; dmTAF5b; dTAF<down>II</down>80; TAF5L                                                                                                                                     |
| Cap      | DmSMC3/Cap; Cap; cap; CG9802; SMC3; DmSMC3                                                                                                                                             |
| cas      | l(3)j1C2; l(3)neo33; CG13281; ming; Cas; cas; CG2102                                                                                                                                   |
| caup     | iroquois-complex; iroquois                                                                                                                                                             |
| CCR4     | CT33003; CG31137; CT39331; CG5534; CCR4; CG17741                                                                                                                                       |



**Table S2 / 3**

|         |                                                                                           |
|---------|-------------------------------------------------------------------------------------------|
| CDC45L  | CG3658; anon-1Ec; EG:BACR7A4.11; Cdc45; D; DmCdc45; CDC45L                                |
| Cdk7    | CDK7; Cdk7; cdk7; CG3319; DmCDK7; DmCdk7; Dmcdk7; DmMO15; p40<sup>MO15</sup>              |
| Cdk8    | CG10572; CDK8; Cdk8; DmCdk8; p58; dTRAP56                                                 |
| Cdk9    | CG5179; p43 PITALRE; Cyclin-dependent kinase9 2.7; PTefb; CDK9; Cdk9; cdk9; P-TEF; P-TEFb |
| Cf2     | BcDNA:GM09668; CF2; Cf2; cf2; CG11924; CF2.5                                              |
| CG10147 | CG10147                                                                                   |
| CG10228 | CG10228                                                                                   |
| CG10267 | CG10267                                                                                   |
| CG10296 | CG10296                                                                                   |
| CG10309 | CG10309                                                                                   |
| CG10366 | CG10366                                                                                   |
| CG10445 | CG10445                                                                                   |
| CG10447 | CG10447; BcDNA:RH50436                                                                    |
| CG10462 | BcDNA:SD07008; CG10462                                                                    |
| CG10543 | CG10543                                                                                   |
| CG10563 | CG10563                                                                                   |
| CG10576 | BEST:CK00496; CG10576                                                                     |
| CG10669 | CG10669                                                                                   |
| CG10685 | CG10685                                                                                   |
| CG10887 | CG10887                                                                                   |
| CG10936 | CG10936                                                                                   |
| CG10959 | CG10959                                                                                   |
| CG11033 | CG11033                                                                                   |
| CG11063 | CG11063                                                                                   |
| CG11107 | CG11107; cg11107                                                                          |
| CG11183 | CG11183                                                                                   |
| CG11247 | CG11247                                                                                   |
| CG11403 | EG:33C11.2; CG11403; cg11403                                                              |
| CG11513 | CG11513                                                                                   |
| CG11552 | CG11552                                                                                   |
| CG11695 | CG11695                                                                                   |
| CG11710 | CG11710                                                                                   |
| CG11762 | i36; CG11762                                                                              |
| CG11835 | CG11835                                                                                   |
| CG11942 | CG11942                                                                                   |
| CG11990 | hyrax                                                                                     |
| CG12000 | CG12000                                                                                   |
| CG12161 | CG12161                                                                                   |
| CG12175 | anon-EST:fe2G7; CG12175                                                                   |
| CG12190 | CG12190                                                                                   |
| CG12227 | CG12227                                                                                   |
| CG12236 | CG12236                                                                                   |
| CG12267 | CG12267                                                                                   |

**Table S2 / 4**

|         |                                               |
|---------|-----------------------------------------------|
| CG12299 | CG12299                                       |
| CG12460 | CG40051; CG12460                              |
| CG12605 | CG12605                                       |
| CG12942 | CG12942                                       |
| CG13185 | CG13185; CG18329                              |
| CG13916 | CG13916                                       |
| CG14216 | CG14216                                       |
| CG14443 | CG14443; cg14443                              |
| CG14655 | CG14655                                       |
| CG14710 | CG14710                                       |
| CG14711 | CG14711                                       |
| CG14802 | dp28b; CG14802; p28; Srb5/Med28b; EG:63B12.13 |
| CG15000 | CG15000                                       |
| CG15073 | CG15073                                       |
| CG15105 | CG15105                                       |
| CG15269 | DS04929.3; CG15269; BG:DS04929.3              |
| CG15436 | CG15436                                       |
| CG15800 | CG15800                                       |
| CG15803 | CG15803                                       |
| CG1582  | CG1582; cg1582                                |
| CG15835 | CG15835                                       |
| CG1602  | CG1602                                        |
| CG16903 | CG16903; EG:67A9.2                            |
| CG16975 | CG16975                                       |
| CG17023 | CG17023                                       |
| CG17068 | CG17068                                       |
| CG1716  | CG1716                                        |
| CG17181 | CG17181                                       |
| CG17209 | CG17209                                       |
| CG17301 | BcDNA:AT30033; CG17301                        |
| CG17302 | CG17302                                       |
| CG17328 | DS02740.8; BG:DS02740.8; CG17328              |
| CG17331 | CG17331                                       |
| CG17359 | CG17359                                       |
| CG17385 | CG17385                                       |
| CG17568 | CG17568                                       |
| CG17612 | CG17612                                       |
| CG17802 | CG17802                                       |
| CG17806 | CG17806                                       |
| CG1792  | CG1792                                        |
| CG18013 | CG18013                                       |
| CG18262 | CG18262                                       |
| CG1832  | CG1832                                        |
| CG18375 | CG18375                                       |
| CG1845  | CG1845                                        |

**Table S2 / 5**

|           |                                                     |
|-----------|-----------------------------------------------------|
| CG18476   | CG18476; CG17822                                    |
| CG18555   | CG18555                                             |
| CG18764   | CG18764                                             |
| CG1884    | anon-EST:Liang-1.29; clone 1.29; CG1884             |
| CG1894    | CG1894; dmHAG407                                    |
| CG1957    | CG1957; BcDNA:LD14168                               |
| CG1965    | CG1965                                              |
| CG1972    | CG1972                                              |
| CG2052    | CG10204; CG2052                                     |
| CG2097    | CG2097                                              |
| CG2120    | CG2120                                              |
| CG2129    | CG2129                                              |
| CG2202    | CG2202                                              |
| CG2469    | CG2469                                              |
| CG2712    | EG:95B7.7; anon-3Be; III; CG2712                    |
| CG2990    | CG2990                                              |
| CG2995    | cab65850 G9a Dm; CG2995; EG:BACR37P7.2              |
| CG3032    | CG3032                                              |
| CG30420   | CG3749; CG12850; CG30420                            |
| CG30431   | CG8341; CG8324; CG30431                             |
| CG30443   | CG12397; CG30443; BcDNA:RE37461                     |
| CG3065    | CG3065                                              |
| CG31156   | CG5253; CG31156; CG5257                             |
| CG31160   | CG13846; CG13851; CG31160                           |
| CG31212   | CG14279; CG18491; CG31212; CG3602                   |
| CG31224   | CG17796; CG31224; CG7696                            |
| CG31365   | CG4639; CG31365                                     |
| CG31367   | CG15187; CG31367                                    |
| CG31368   | CG14729; CG14730; CG31368                           |
| CG31441   | CG5135; CG31441                                     |
| CG31453   | CG11743; CG31453; CG11744                           |
| CG31716   | CG5244; CG31716; CG5251; cg5251                     |
| CG32067   | CG8000; CG32067; CG7983                             |
| CG3225    | CG3225; cg3225                                      |
| CG32344   | CG32344; DmRH20; CG6994; cg6994                     |
| CG32533   | CG12211; cg12211; CG14198; CG32533                  |
| CG32721   | CG32721; BcDNA:GH10333; CG12152                     |
| CG32767   | i7; CG32767; CG5113; LD34931; CG5086; BcDNA:GM08530 |
| CG32772   | CG15469; CG6911; CG32772                            |
| CG3281    | CG3281                                              |
| CG33005-O | CG10438; CG33005-ORFA; CG10438a                     |
| CG33097   | CG15187; CG33097                                    |
| CG33182   | CG4037; CG33182                                     |
| CG3335    | CG3335; cg3335; Dm-RBD-1; Q9VT19                    |
| CG3407    | CG3407                                              |

**Table S2 / 6**

|         |                                             |
|---------|---------------------------------------------|
| CG3485  | CG3485                                      |
| CG3561  | CG3561; cg3561; DmRH9                       |
| CG3654  | CG3654                                      |
| CG3689  | CG3689                                      |
| CG3708  | EG:BACR7A4.18; CG3708                       |
| CG3726  | CG3726                                      |
| CG3732  | CG3732                                      |
| CG3753  | CG3753                                      |
| CG3756  | CG3756                                      |
| CG3941  | CG3941                                      |
| CG40351 | CG17395; CG17396; aaf45425 Dm; CG40351      |
| CG4049  | CG4049                                      |
| CG4078  | CG4078                                      |
| CG4282  | CG4282                                      |
| CG4360  | CG4360                                      |
| CG4413  | CG4413                                      |
| CG4424  | CG4424                                      |
| CG4707  | CG4707                                      |
| CG4730  | CG4730                                      |
| CG4756  | CG4756                                      |
| CG4854  | CG4854                                      |
| CG4901  | CG4901; cg4901                              |
| CG4935  | MET30; BG:DS02740.2; CG4935                 |
| CG4936  | CG4936                                      |
| CG5017  | CG5017                                      |
| CG5161  | BcDNA:RE62842; CG5161                       |
| CG5202  | CG5202                                      |
| CG5205  | CG5205; cg5205                              |
| CG5222  | CG5222                                      |
| CG5245  | CG5245                                      |
| CG5249  | CG5249                                      |
| CG5319  | CG5319                                      |
| CG5366  | BcDNA:GH07774; CG5366                       |
| CG5380  | CG5380                                      |
| CG5382  | CG5382                                      |
| CG5591  | CG5591                                      |
| CG5604  | CG5604                                      |
| CG5640  | CG5640                                      |
| CG5641  | Interleukin enhancer binding factor; CG5641 |
| CG5684  | CG5684                                      |
| CG5708  | CG5708                                      |
| CG5874  | CG5874; BcDNA:SD07139                       |
| CG5882  | CG5882                                      |
| CG5899  | CG5899                                      |
| CG6004  | CG6004                                      |

**Table S2 / 7**

|        |                                                     |
|--------|-----------------------------------------------------|
| CG6061 | p120; CG6061                                        |
| CG6118 | CG6118                                              |
| CG6121 | EG0007.7; DmEG0007.7; dmHAG405; CG6121; EG:EG0007.7 |
| CG6197 | CG6197                                              |
| CG6204 | CG6204                                              |
| CG6220 | CG6220                                              |
| CG6254 | CG6254                                              |
| CG6418 | DmRH27; CG6418; cg6418                              |
| CG6654 | CG6654                                              |
| CG6686 | CG6686                                              |
| CG6689 | dmCG6689; CG6689                                    |
| CG6701 | CG6701; EP2054; EP(2)2054                           |
| CG6751 | CG6751                                              |
| CG6755 | CG6755                                              |
| CG6792 | CG6792                                              |
| CG6808 | CG6808; CG31372                                     |
| CG6843 | CG6843                                              |
| CG6905 | CG6905                                              |
| CG6967 | CG6967                                              |
| CG7099 | CG7099                                              |
| CG7154 | CG7154                                              |
| CG7185 | CG7185; cg7185                                      |
| CG7233 | CG7233                                              |
| CG7246 | CG7246                                              |
| CG7257 | DmCG7257; Dm_Rpt4c; CG7257                          |
| CG7274 | CG7274                                              |
| CG7312 | CG31670; CG7312                                     |
| CG7339 | CG7339                                              |
| CG7372 | CG7372                                              |
| CG7386 | CG7386                                              |
| CG7504 | CG7504                                              |
| CG7597 | AC017581; CG7597                                    |
| CG7698 | CG7698                                              |
| CG7804 | CG7804; cg7804                                      |
| CG7878 | CG7878; cg7878; DmRH26                              |
| CG7907 | CG7907                                              |
| CG7922 | CG7922; cg7922                                      |
| CG7928 | CG7928                                              |
| CG7963 | CG7963                                              |
| CG7987 | CG7987                                              |
| CG8117 | CG8117                                              |
| CG8120 | CG8120                                              |
| CG8145 | CG8145                                              |
| CG8159 | CG8159                                              |
| CG8165 | CG31123; CG8165                                     |

**Table S2 / 8**

|           |                                                                                                                                                                                                                 |
|-----------|-----------------------------------------------------------------------------------------------------------------------------------------------------------------------------------------------------------------|
| CG8290    | BEST:LD29214; LD29214; CG8290                                                                                                                                                                                   |
| CG8301    | CG8301                                                                                                                                                                                                          |
| CG8388    | CG8388                                                                                                                                                                                                          |
| CG8484    | CG8484                                                                                                                                                                                                          |
| CG8915    | CG8915; cg8915                                                                                                                                                                                                  |
| CG8924    | CG8924                                                                                                                                                                                                          |
| CG8950    | CG8950                                                                                                                                                                                                          |
| CG8974    | CG8974                                                                                                                                                                                                          |
| CG9086    | CG9086; Ubr1                                                                                                                                                                                                    |
| CG9207    | GAS41; CG9207                                                                                                                                                                                                   |
| CG9215    | CG9215                                                                                                                                                                                                          |
| CG9323    | CG9323; cg9323; 38E.15                                                                                                                                                                                          |
| CG9418    | CG9418; BEST:LD07122; LD07122                                                                                                                                                                                   |
| CG9425    | CG9425                                                                                                                                                                                                          |
| CG9588    | CG9588                                                                                                                                                                                                          |
| CG9609    | CG9609                                                                                                                                                                                                          |
| CG9650    | CG9650                                                                                                                                                                                                          |
| CG9772    | CG9772                                                                                                                                                                                                          |
| CG9791    | CG9791                                                                                                                                                                                                          |
| CG9793    | CG9793                                                                                                                                                                                                          |
| CG9797    | CG9797                                                                                                                                                                                                          |
| CG9868    | CG9868                                                                                                                                                                                                          |
| CG9899    | CG9899                                                                                                                                                                                                          |
| Chd1      | Chd1; chd1; DmCHD1; CG3733; dCHD1; CHD-1                                                                                                                                                                        |
| Chd3      | CHD3; Chd3; chd3; DmCHD3; CG9594                                                                                                                                                                                |
| chm       | chm; dmHAG404; CG5229; HAT; HAT1                                                                                                                                                                                |
| Chrac-14  | 55A11T; CHRAC; CG13399; CHRAC-14; Chrac-14; CHRAC14; mary; ESTS:55A11T; CG10890                                                                                                                                 |
| Chrac-16  | BcDNA:RE59557; CG15736; CHRAC16; CHRAC; CHRAC-16; Chrac-16; joey                                                                                                                                                |
| ci        | CID; CiD; ciD; CG2125; I(4)13; ci155; Ce; cubitus-interruptus-Dominant; I(4)17; I(4)102ABc; Ci; ci; ci-D; Ci<sup>D</sup>; ci<sup>D</sup>                                                                        |
| cic       | CG5067; cic; E(DI)D49; fet; fettucine                                                                                                                                                                           |
| Clk       | dCLOCK; dClock; dclock; dClck; dCLK/JRK; PAS1; Jrk; jrk; Clk; clk; CLOCK; clock; Jerk; CG7391; dCLK; dClk                                                                                                       |
| Clp       | CG3642; c6a; CLP; Clp; clp; Ssb-c6a                                                                                                                                                                             |
| cnc       | CG4578; cap and collar; CNC; Cnc; cnc; CG17894; CNC_DROME; 5134; Cap 'n' collar; cap 'n' collar; cap'n'collar; I(3)03921                                                                                        |
| cpsf      | CPSF; Cpsf; cpsf; dCPSF-160; CG10110                                                                                                                                                                            |
| CrebA     | dCREBA; dCrebA; BOX B Binding Factor-2; BBF-2; CREB-a; Creb-A; dCreb-A; dCREB-A; BcDNA:SD05937; BBF2_DROME; I(3)03576; CG7450; creb; Creb; CREB; CrebA; crebA; Bbbf2                                            |
| CrebB-17A | dCREB; dCREB-2a; dCREB2-a; dCREB2-b; dCbz; S162; CREB2; dCREB-B; Creb2b; CREB2b; dCREB2; dCREB2a; CG6103; dCREB2b; CrebB17-A; CrebB-17A; cAMP-regulated enhancer-binding protein; CREB; Creb; I(1)17Af; dCREB-2 |
| croc      | FD1; fd1; Dmfd1; CG5069; fd78E; croc                                                                                                                                                                            |

**Table S2 / 9**

|         |                                                                                                                                                              |
|---------|--------------------------------------------------------------------------------------------------------------------------------------------------------------|
| crol    | crol; I(2)04418; I(2)s2346; CG14938; crol gamma; crol beta; crol alpha                                                                                       |
| crp     | CG7664; I(2)35Fd; AP-4; crp; dAP-4; I(2)00232; I(2)k03505; BG:DS02740.3; I(2)k00809                                                                          |
| CSN5    | CH5; JadBp; CG14884; DCH5; Dch5; dch5; BcDNA:LD14392; I(3)L4032; quo; JAB1/CSN5; jab1/csn5; BcDNA.LD14392; csn5; Csn5; CSN5; Jab1                            |
| CstF-50 | CstF-50; CG2261                                                                                                                                              |
| CstF-64 | CStF 64; CG7697; CstF-64                                                                                                                                     |
| CtBP    | G9; I(3)03463; I(3)G9; CG7583; I(3)03464; 0256/16; 256/16; BcDNA:GH07572; I(3)87De; CtBP; RE61183; RE01030; EP(3)3528; dCtBP                                 |
| cul-2   | CG1512; cul-2; DMcul-2; I(2)02074; Cul2                                                                                                                      |
| cul-4   | Cul4; CG8711; cul-4; DMcul-4                                                                                                                                 |
| cyc     | CYCLE; Cycle; dBMAL; dBmal; dBMAL1; dbmal1; CG8727; dBma1; BMAL1; Bmal1; bMAL1; bmal1; Mop3; MOP3; cyc; Cyc                                                  |
| CycC    | Cln3; dTRAP33; CycC; cycC; Dmcycc; cyclin C; SRB11; CG7281; Cyc-C                                                                                            |
| CycH    | CG7405; cyclin H; CycH                                                                                                                                       |
| CycK    | CycK; CG15218; cyclin K                                                                                                                                      |
| CycT    | CycT; cyclin T; cyclin T1; Dmcyclin T; p124; dT; cyclin T2; CG6292; P-TEFb                                                                                   |
| Cyp1    | CyP-1; Cyp-1; cyp-1; BcDNA:GM09255; CG9916; Cpy1; Cyp1; cyp1                                                                                                 |
| D       | SOX70; CG5893; D; SOX70D; Sox70D; fish-hook; fish; fish hook; I(3)LG9; SOXB2.1; SOXDP; loD                                                                   |
| D19A    | Zinc finger AT-hook protein; CG10269; D19A                                                                                                                   |
| D19B    | D19B; CG10270                                                                                                                                                |
| da      | I(2)31Ea; CG5102; daughterless; da                                                                                                                           |
| dac     | dach; spn; Dm-DAC; dac; Dac; I(2)rK364; dachsund; BG:DS02780.3; I(2)36Ae; CG4952                                                                             |
| dalao   | dalao; CG7055; BAF57; BAP111; Bap111                                                                                                                         |
| Dcr-2   | CG6493; cg6493; Dcr-2; dcr-2; Dicer                                                                                                                          |
| Ddx1    | DDX1; Ddx1; DmDDX1; Dbp79E; CG9054; anon-79E; DmRH12                                                                                                         |
| Deaf1   | Deaf1; CG8567; DEAF-1; Deaf-1; deaf-1                                                                                                                        |
| Dfd     | I(3)84Ae; EbR11; BG:DS00276.5; CG2189; deformed; Dfd; DmDfd                                                                                                  |
| dik     | dik; HL-XIV; Ada3; CG7098; DADA3                                                                                                                             |
| DIP1    | TO67; UbxBP1; klett; clot 10495; CG17686; clot 2020; TO34; klt; dip1; DIP1; dip1a                                                                            |
| dl      | dL; dl; mat(2)dorsal; CG6667; fs(2)k10816                                                                                                                    |
| dlt     | CG12021; CG1977; I(3)04276; dlt; Van; Vanaso; CG32315; I(3)62Ba; I(3)dre1; dre1                                                                              |
| dom     | CG9696; dom; I(2)k08108; 27/4; domino; I(2)81/8; I(2)k02704                                                                                                  |
| Dox-A2  | Diphenol oxidase; proPO; I(2)37Bf; DPO; phenol oxidase; phenoloxidase; DXA2_DROME; DmePPO2; I(2)37Bf<sup>+</sup>; CG10484; Dox; Dox-A2; DoxA; p58; DoxA2; PO |
| Dp      | DP; Dp; DmDP; I(2)vr10; dDp; dDP; vr10; dDP1; I(2)49Fk; CG4654; 49Fk                                                                                         |
| Dp1     | BcDNA:LD21677; DDP1; BcDNA:LD21383; Dp1; CG5170                                                                                                              |
| dpa     | MCM4; Mcm4; DmMCM4; DmMcm4; Dpa; dpa; CG1616; I(2)43Ca; 43Ca; Drosophila proliferation abnormal                                                              |
| dpld    | I(2)k08815-3; dpld; lin-41; CG1624                                                                                                                           |
| dpn     | anon-EST:fe1B12; dpn; 44C; CG3161; CG8704; deadpan                                                                                                           |
| dre4    | DRE4/dSPT16; I(3)62Bg; dSPT16; dspt16; CG1828; spt16; Spt16; I(3)dre4; dre4                                                                                  |

**Table S2 / 10**

|           |                                                                                                                                                                                                                         |
|-----------|-------------------------------------------------------------------------------------------------------------------------------------------------------------------------------------------------------------------------|
| dsx       | Dmdsx; CG11094; ix-62c; Hr; dsx                                                                                                                                                                                         |
| E(bx)     | NURF-215; Nurf-215; p301; l(3)122; p215; CG17135; CG32346; nurf301; Nurf301; NURF301; CG10894; l(3)ry122; E(bx); CG32478; NURF215; CG7022; En-bx; NURF; NURF-301; dNURF                                                 |
| E(Pc)     | l(2)28-28-12; anon-48Ac; E(Pc); e(Pc); GH14582; lll; CG7776; GH05739                                                                                                                                                    |
| e(r)      | e(r); CG1871; ER                                                                                                                                                                                                        |
| E(spl)    | CG8365; Hes; E(spl)bHLH; En(spl)-C; E(spl); e(spl); m8; l(3)96Fd; Enhancer of split m7; E(spl) m8; Enhancer of split m8; E(spl)m8; E(spl)M8; En(spl); E(spl)-m8; clone 1.71; anon-EST:Liang-1.71                        |
| e(y)1     | e(y)1; TAF<down>ll</down>; TAF42; Taf42; e(y)4; TAF40/42/e(y)1; TAF<down>ll</down>40; Taf<down>ll</down>40; dTAF42; TAF<down>ll</down>42; d40; dTAF<down>ll</down>40; TAFll40(42); dTAF<down>ll</down>42; e(y)<up>1</u> |
| E(z)      | E(z)1; pco/E(z); pco; enhancer of zeste; l(3)67Fa; Su(z)301; l(3)ds12; E(Z); E(z); l(3)SG17; l(3)B12; CG6502; E[z]; polycombeotic; l(3)1902; Enhancer-of-zeste; Ez; EZ                                                  |
| E103      | E103; 90Bre                                                                                                                                                                                                             |
| E2f       | CG6376; l(3)j3B1; dE2F; dE2f; l(3)j3C2; drosE2F1; E(Sev-CycE)3A; DmE2F-1; DRTF1/E2F; Evar(3)164; E2f1; E2F1; E(var)93E; E(var)3-93E; l(3)rM729; l(3)07172; dE2F1; de2f1; E(var)3-95E; E2F-1; e2f; E2f; E2F              |
| E2f2      | dE2F-2; CG1071; dE2F2; de2f2; E2F; E2F2; E2f2                                                                                                                                                                           |
| E81       | E81                                                                                                                                                                                                                     |
| ear       | ear; dENL/AF9; CG4913; ENL/AF-9; ENL/AF9                                                                                                                                                                                |
| EcR       | Dhr23; snt; EcR-A; NR1H1; EcRB-1; EcR-B1; EcR; ECR; DmEcR; CG1765; DEcR; dECR; EcdR; Ecdysone Receptor; ecdysone receptor                                                                                               |
| eIB       | el; elbow; P10; CG4220; eIB; elb; BG:DS06238.3                                                                                                                                                                          |
| Elongin-B | Elongin-B; CG4204; d-elongin B                                                                                                                                                                                          |
| Elongin-C | d-elongin C; Elongin-C; BcDNA:RH71704; CG9291                                                                                                                                                                           |
| emc       | CG1007; ms(3)61CD; 0094/26; 0587/01; 0203/10; Emc; emc; l(3)05592; l(3)j4E11; Dm0688; l(3)04322; Ach; gov; 0977/09                                                                                                      |
| en        | Es; CG9015; Apa; Eng; en; Engrailed/Invected; V; spt                                                                                                                                                                    |
| enok      | anon-60Ba; anon-WO0200864.2; S1; rot; CG11290; rotkehlchen; dmHAG406; enok                                                                                                                                              |
| EP2237    | CG4427; EP2237; EP(2)2237                                                                                                                                                                                               |
| ERR       | CG7404; ERR; dERR                                                                                                                                                                                                       |
| esc       | extra sex combs; ESC; Esc; esc; CG14941; L41867                                                                                                                                                                         |
| esg       | CG3758; fleabag; BG:DS07851.7; l(2)br43; 4B7; l(2)esg; shof; l(2)07082; wizard; Fusion-1; dgl; flg; wiz; br43; l(2)4B7; l35Ce; esg; l(2)35Ce; shut off                                                                  |
| ESTS:136D | 136D12S; ESTS:136D12S                                                                                                                                                                                                   |
| ESTS:42D3 | 42D3T; ESTS:42D3T; anon-sts30                                                                                                                                                                                           |
| Fer3      | Fer3; Dnato3; ntwist; BcDNA:LD04689; CG6913; nato3; N-twist                                                                                                                                                             |
| fkh       | Fkh; fkh; Dmfkh; FORK HEAD; Forkhead; Sebp2; CG10002                                                                                                                                                                    |
| fru       | CG7690; ms(3)06411; fty; BTB-VI; BtbVI; CG7688; cg7688; sat; cg7689; CG7689; CG14307; fru-satori; CT22773; fru                                                                                                          |



**Table S2 / 11**

|        |                                                                                                                                                                                                                     |
|--------|---------------------------------------------------------------------------------------------------------------------------------------------------------------------------------------------------------------------|
| fs(1)h | fsh; l(1)G0093; fs(1)h; rnc; l(1)G0495; l(1)7Da; fs(1)1456; fs(1)M16; fs(1)R10.4; anon-EST:fe1G2; CG2252; N72; fst(1)h; clone 1.81; fs(1)26/26A; anon-EST:Liang-1.81                                                |
| ftz-f1 | beta-Ftz-F1; alphaFTZF1; betaFTZF1; NR5A1; DmFTZ-F1; DEP1; FTZF1; CG13378; FIP1; alphaFTZ-F1; alphaftz-f1; ftz-f1alpha; FTZ-F1alpha; beta FTZ-F1; betaFTZ-F1; betaftz-F1; betaftz-f1; beta FTZ-F1; l(3)03649; dFtz- |
| GATAd  | GATAd; dGATAd; CG5034                                                                                                                                                                                               |
| GATAe  | GATAe; CG10278; dGATAe                                                                                                                                                                                              |
| gft    | gft; Cul-3; DMcul-3; Cul3; dCul-3; Cullin3; l(2)br34; br34; CG11861; l35Cd; dCul3; l(2)06430; l(2)35Cd; BG:DS07851.2                                                                                                |
| glu    | BcDNA.LD20207; l(2)k08819; Gluon; SMC4; glu; DmSMC4/gluon; BcDNA:LD20207; CG11397                                                                                                                                   |
| GM130  | GM130; CG11061; dGM130; dgm130                                                                                                                                                                                      |
| gol    | g1; anon-G1; CG2679; gol; meso                                                                                                                                                                                      |
| grh    | grh; hsk; NTF-1; EG:191D12.1; Elf1; elf1; Ntf; l(2)s2140; Elf-1/NTF-1; NTF-1/Elf-1; elf1(CAG)<down>7</down>; l(2)IM45; Gh; l(2)06850; Elf-1; NTF1; Ntf1; CG5058; grainyhead; Grainyhead; DREB                       |
| grn    | dGATA-2; GATAc; GRAIN; l(3)84Fa; CG9656; dGATAc; dGatac; grn; gra; Gata-c; Gata2                                                                                                                                    |
| gro    | m9,m10; CG8384; m9-m10; m9/m10; E(spl)<sup>2</sup>; m9; E(spl)m9/m10; Gro; gro; BcDNA:LD33829; dGro; E(spl)-WD; E(spl)gro; m10; En-spl; m9/10; Groucho; l(3)gro; BcDNA.LD33829                                      |
| Gsc    | M72; 60Mun1; 60Mun2; CG2851; Muenster 72; l(2)05341; gsc; Gsc; D-gsc; D-Gsc; Pph25; PPH25                                                                                                                           |
| gt     | CG7952; l(1)giant; Giant; gt; l(1)3Aa; GIAN_DROME; EG:BACH7M4.5                                                                                                                                                     |
| Gug    | l(3)01323; l(3)rO116; CG6964; Gug; l(3)j5A3; Atrophin; Atro; atro; l(3)03928                                                                                                                                        |
| H      | H; CG5460; hairless                                                                                                                                                                                                 |
| h      | h; CG6494; dDr1; 8247; l(3)08247; brr; l(3)rM384                                                                                                                                                                    |
| hay    | ERCC3; hwr; hay; nc2; TFIIH; DhR25; DhXPB; ms(3)nc2; DmXPB; Xpb/hay; CG8019; i50                                                                                                                                    |
| Hcf    | Hcf; CG1710; dHCF                                                                                                                                                                                                   |
| HDAC4  | dHDAC4; HDAC; CG1770; GC1770; HDAC4; HDAC4a; dmHDA405                                                                                                                                                               |
| HDAC6  | CG6170; HDAC; dHDAC6; HDAC2; DmHDAC2; histone deacetylase HDA2; dHDAC2; dmHDA404; HDAC6                                                                                                                             |
| Hel89B | 89B helicase; 89B; Hel89B; BTAF1; CG4261                                                                                                                                                                            |
| Hira   | dHira; dhira; Dhh; HIRA; Hira; hira; CG12153                                                                                                                                                                        |
| His3   | DmeH3; core histone; His; H3 Histone; histone H3; His3; his3; HisC; H3.1; histone-3; histone; Histone; H3; PH3; dH3                                                                                                 |
| His4   | DmeH4; core histone; 4; histone H4; H4Ac16; HisC; his4; His4; histone; Histone; Bin2; H4                                                                                                                            |
| HLHm3  | m3; E(spl)M3; E(spl)m3; split locus enhancer protein m3; HLH-m3; E(Spl)-HLH-m3; HLHm3; HLHM3; CG8346                                                                                                                |
| HLHm5  | m5; HLH-m5; E(spl)-m5; HLHm5; CG6096; E(spl) transcription unit m5; E(spl)M5; E(spl)m5                                                                                                                              |

**Table S2 / 12**

|           |                                                                                                                                                                                                                  |
|-----------|------------------------------------------------------------------------------------------------------------------------------------------------------------------------------------------------------------------|
| HLHmbeta  | E(spl)beta; E(spl); HLHmbeta; HLHmbeta; split locus enhancer protein mA; mbeta; mbeta; Mbeta; HLHmA; Dm-mA; E(spl) mbeta; E(spl)Mbeta; E(spl)mbeta; mA; E(spl)mbeta; CG14548; HLH-mbeta; E(spl)mA; E(Spl) HLH    |
| HLHmdelta | E(spl)delta; E(Spl) HLH-m delta; E(Spl)-HLH-mdelta; HLHmdelta; split locus enhancer protein mC; E(spl)-mdelta; mdelta; HLHmC; HLHMD; E(spl)mbeta; mC; E(spl)mdelta; E(spl)Mdelta; HLHmdelta; HLH-mdelta; E(spl)m |
| HLHmgamm  | E(spl)-mgamma; anon-EST:Liang-1.49; E(spl)gamma; split locus enhancer protein mB; HLHmgamma; HLHmB; Dm-mB; mgamma; Mgamma; mB; mgamma; E(spl)mgamma; E(spl)Mgamma; E(spl)mB; Enhancer of split mgamma; e(spl)mga |
| HmgD      | CG17950; HMG D; HmgD; dHMG-D; clone 1.9; hmg-D; HMG-D; anon-EST:Liang-1.9                                                                                                                                        |
| HmgZ      | anon-EST:Liang-1.58; HMG-Z; hmg-Z; clone 1.58; CG17921; HmgZ; BcDNA:RE28596; dHMG-Z                                                                                                                              |
| HP1b      | HP1b; Hp1b; CG7041                                                                                                                                                                                               |
| HP1c      | CG6990; HP1c                                                                                                                                                                                                     |
| Hr38      | 38E.3; DHR38; Dhr38; NR4A4; I(2)02306; 38E.7; CG1864; HR38; Hr38                                                                                                                                                 |
| Hr39      | i70; DHR30; betaFTZ-F1; FTZ-F1beta; ftz-F1beta; ftz-f1beta; CG8676; Hr39; EP(2)2490; dFTZ-F1beta; NR5B1; ftz-F1; FTZ-F1; DHR39; FTZ-F1B; DHR39/Ftz-F1beta                                                        |
| Hr4       | DHR4; CG16902; EG:133E12.2; Hr4                                                                                                                                                                                  |
| Hrb87F    | Hrb85CD; CG12749; Hrb87F; Hrb87f; Hrb87Fa; P11; P11/Hrb87F; HRB87F/hrp36; HRP36; Hrp36; hrp36; Q14; Q16; p38; Hrb2; hrp40                                                                                        |
| Hsf       | HSF; Hsf; hsf; CG5748; D-HSF; DmHSF; I(2)03091; dHSF; Dm-Hsf                                                                                                                                                     |
| inv       | engrailed-related; CG17835; engrailed-invected; Engrailed/Invected; inv; er; in; IV                                                                                                                              |
| lswi      | dISWI; p140/ISWI; CHRAC; ISW; SWI; anon-EP1279744.124; dCHRAC; p140; ACF; ISWI ATPase; NURF; ISWI; lswi; iswi; Nurf-140; NURF-140; CG8625; dNURF                                                                 |
| ix        | CG13201; ix                                                                                                                                                                                                      |
| Jra       | dJRA; dJra; AP1; I(2R)IA109; dm-Jun; jun; Jun; d-JRA; AP-1; cJun; dJun; dJUN; Djun; DJun; DJUN; I(2)IA109; dAP-1; CG2275; Jun oncogene; c-Jun; Jra; D-Jun; D-jun; d-Jun; d-jun                                   |
| jumu      | Dom; jumu/Dom; Scim31; Dwhn; jumu; Dmjumu; 5295; I(3)06439; Domina; CG4029; E(var)631; Whn; I(3)06142; jumeaux                                                                                                   |
| kay       | AP1; kay; fos; Fos; dFos; Dfos; DFos; DFOS; CG15509; AP-1; dAP-1; sro; c-Fos; Fra; d-fos; D-fos; D-Fos; dlhD; DFra; dFRA; dFra                                                                                   |
| kis       | CG3696; EK2-4; I(2)k08827; KIS; kis; 2532; 136/31; CG18326; I(2)07812; GM02209; Su(Pc)21AB; 5841; I(2)s3527; I(2)k14112; I(2)s4771; I(2)k13631; I(2)s4793; CG3660; BEST:GM02209                                  |
| kn        | Collier-Knot; knotted; kn; Kn; collier; CG10197; col; Col                                                                                                                                                        |
| kni       | KNI; Kni; kni; NR0A1; Knirps; kn; ri; CG4717                                                                                                                                                                     |
| Kr        | kruppel; CG3340; Kr; kr; Krpple; lf                                                                                                                                                                              |
| kto       | CG8491; kohtalo; dTRAP230; DTRAP230; Kto; Kto/Med12; MED12; Med12; siren1; SRB8; Srb8/KTO/TRP230; Trap230; Mediator complex subunit 12                                                                           |
| Ku80      | Ku80; BG:DS09217.6; CG18801                                                                                                                                                                                      |
| kz        | I(1)N4; CG3228; I67; EG:30B8.2; kz; N8; I(1)2Eb; N1                                                                                                                                                              |
| I(1)10Bb  | lethal(1)10Bb; I(1)G14; I(1)10Bb; I(1)GLM14; 10Ba; CG1639; I(1)G0169                                                                                                                                             |

**Table S2 / 13**

|           |                                                                                                                                                                                                         |
|-----------|---------------------------------------------------------------------------------------------------------------------------------------------------------------------------------------------------------|
| I(1)G0007 | I(1)G0308; I(1)G0416; I(1)G0176; I(1)G0491; CG1405; cg1405; EP764; I(1)G0476; EP784; CG32604; I(1)G0103; CG1375; I(1)G0007; I(1)G0028                                                                   |
| I(2)01424 | I(2)01424; CG3845                                                                                                                                                                                       |
| I(2)05070 | CG8392; I(2)05070                                                                                                                                                                                       |
| I(2)NC136 | I(2)NC136; CG8426                                                                                                                                                                                       |
| I(3)73Ah  | lethal(3)73Ah; I(3)02540; I(3)73Ah; CG4195; I(3)133.18                                                                                                                                                  |
| I(3)mbt   | CG5954; CG18582; tumor-suppressor; I(3)mbt; MBT; mbt; I(3)malignant braintumor                                                                                                                          |
| La        | ribonucleoprotein La; DLa/SS-B; 38C.38; CG10922; La; BEST:LD24519; dmLa; D-La                                                                                                                           |
| lds       | factor 2; lds; DmF2; transcript A; early-B; early; early-3; CG2684; NTef2; lod; early-5                                                                                                                 |
| lid       | lid; I(2)10424; CG9088                                                                                                                                                                                  |
| lin19     | CG1877; cul-1; I(2)k01207; Cul1; dCul-1; Cullin1; dCul1; I(2)02074; dCullin1; lin19; lin19-like                                                                                                         |
| Lip       | I(3)s5196; I(3)j3D2; Lip; 4136; I(3)j3D5; I(3)01086; I(3)rG338                                                                                                                                          |
| lola      | BcDNA:LD17006; CG30012; CG30013; CG30014; BTB-IV; CG12052; lola; I(2)00642; CG18380; CG18381; LD03274; CG18376; CG18378; CG18379; BtbIV; BEST:LD03274; sw59; longitudinals absent; I(2)s3697; misguided |
| lz        | spe; fs(1)A1569; CG1689; amx; Lz; lz; fs(1)M69                                                                                                                                                          |
| Mad       | CG12399; MAD; Mad; mad; E(zen)2; 2/23; I(2)K00237; I(2)k00237; apg; En(vvl)                                                                                                                             |
| Mat1      | MAT1; Mat1; CG7614                                                                                                                                                                                      |
| Mcm10     | CG9241; Mcm10; Scim19; DmMCM10                                                                                                                                                                          |
| Mcm2      | DmMCM2; DmMcm2; PCR3; CG7538; I(3)rL074; dMCM2; MCM2; Mcm2                                                                                                                                              |
| Mcm3      | MCM3; Mcm3; DmMCM3; DmMcm3; dMCM3; Mcp-PCR2; CG4206; PCR2                                                                                                                                               |
| Mcm5      | MCM5; Mcm5; mcm5; DmMCM5; DmMcm5; DmCDC46; CG4082; PCR4; DmCDC465                                                                                                                                       |
| Mcm6      | CG4039; MCM6; Mcm6; DmMCM6; fs(1)K1214                                                                                                                                                                  |
| Mcm7      | Mcp-PCR1; MCM7; Mcm7; mcm7; DmMCM7; CG4978; PCR1                                                                                                                                                        |
| Med       | I(3)SG70; I(3)XlIm137; anon-EST:Posey121; I(3)SG36; E(zen)3; Med; med; I(3)11m-254; I(3)12m-137; medea; dSmad4; CG1775                                                                                  |
| MED19     | CG5546; Mediator complex subunit 19                                                                                                                                                                     |
| Med21     | Med21; BcDNA:GH01072; CG6884; dMED21                                                                                                                                                                    |
| Med23     | BcDNA:GM31575; CG5121; Med23; dMED23                                                                                                                                                                    |
| Med24     | anon-EST:Liang-1.82; BACR7A4.6; dMED24; Srb6/Surf5; clone 1.82; CG3034; Med24; CG18830; EG:BACR7A4.6                                                                                                    |
| MED26     | CG1793; Arc70; ARC 70; CG1823; dARC70; Med26; Mediator complex subunit 26                                                                                                                               |
| Med6      | dMED6; dMed6; dTRAP32; anon-EST:Posey279; CG9473; Mediator; p35; BcDNA:LD15729; Trap32; Med6; MED6                                                                                                      |
| Med7      | CG6529; dMED7; CG31390; dTRAP34; MED7; Med7; Mediator                                                                                                                                                   |
| MED9      | CG42517; CG5134; Mediator complex subunit 9; BcDNA:LD07740; BcDNA:RH42446; CG30112; CG30113                                                                                                             |
| Mef2      | C; mef2; Mef2; MEF2; DMEF2; DMef2; Dmef2; dMEF2; dMef2; dmef2; SD04091; mef-2; MEF-2; Mef; mef; CG1429; D-MEF2; D-Mef2; D-mef2; Dmef-2; DMef-2; DMEF-2; Dmef; BEST:SD04091                              |
| mei-P26   | CG12218; mei-P26; BcDNA:GH10646; AF145661                                                                                                                                                               |
| Mes-4     | dMES-4; dMes-4; CG4976; Mes-4                                                                                                                                                                           |

**Table S2 / 14**

|           |                                                                                                                                                                                                                                   |
|-----------|-----------------------------------------------------------------------------------------------------------------------------------------------------------------------------------------------------------------------------------|
| Mi-2      | 0854/01; I(3)j3D4; MI2; Mi 2; I(3)A154.3M3; hip76; I(3)01058; I(3)S000606; Dm-Mi-2; Mi-2; I(3)S085401; CG8103; Pha; pha; dMi-2; dMI-2; dMi; 0006/06                                                                               |
| mirr      | CG10601; I(3)69Ca; Iroquis complex; I(3)69Da; mir; Sail; crep; Iro; iro; caupalican; mrr; Mrr; I(3)A5-3-42; cre; De1; mirr; iro-C; Iro-C; IRO-C; I(3)6D1; iroquois; De3; Sai; DH1                                                 |
| mle       | nap<sup>ts</sup>; mll; mak; CG11680; no action potential; mls; mle; MLE; nap                                                                                                                                                      |
| Mms19     | CG12005; dMMS19; NEST:bs07f08; Mms19                                                                                                                                                                                              |
| mod(mdg4) | I(3)L3101; CG7836; Mod[mdg4]; CG15500; I(3)j2B7; CG15501; CG7859; CG15802; CG18151; mod(mdg-4); CG32491; mod(gypsy); Doom; doom; E(var)3-93D; E(var)93D; E-var(3)1; modifier of midget4; mod2.2; I(3)03852; E-var(3)3; bpd;       |
| mof       | MOF; Mof; mof; dmMOF; CG3025; dMOF; max                                                                                                                                                                                           |
| mor       | I(3)89B1; Moira; E(E2F)3B; dmMOIRA; Swi3D; CG4275; brahma-like; BAP155; mor; CG18740                                                                                                                                              |
| morgue    | CG15437; BcDNA:GH02435; morgue                                                                                                                                                                                                    |
| Mov34     | CG3416; Mov34; I(2)k08003; p39B; PRSC_DROME                                                                                                                                                                                       |
| MRG15     | Dmrg15; CG6363; I(3)j6A3; MRG15; DmMRG15                                                                                                                                                                                          |
| msl-1     | i94; male specific lethal; kmB; msl-1; MSL-1; mls-1; CG10385; msl; MSL; km(2)B; msl1; Msl1; MSL1                                                                                                                                  |
| msl-2     | CG3241; male specific lethal; kmA; msl-2; MSL-2; km(2)A; msl; MSL; msl2; Msl2; MSL2                                                                                                                                               |
| msl-3     | mle3; male specific lethal; mle(3)132; CG8631; msl-3; MSL-3; msl; MSL; DmMsl-3; msl3; MSL3; mls3                                                                                                                                  |
| mTTF      | DS01068.4; CG18124; BG:DS01068.4; mTTF; DmTTF                                                                                                                                                                                     |
| mus304    | mus(3)304; mus-304; mus304; CG7347                                                                                                                                                                                                |
| mus308    | mus308; Nuc3; Pol theta; CG6019; 0443/09; mus-308; AAF54858                                                                                                                                                                       |
| mus309    | DmKu70; mus309; blm; CG6920; RecQ; DmBlm; Dmblm; gesta1                                                                                                                                                                           |
| Myb       | I(1)XVI; Dm-Myb; Dm-myb; c-Myb; c-myb; myb; Myb; D-myb; Dm Myb; Dm myb; dmMYB; DmMYB; CG9045; dMyb; DMyb; p85                                                                                                                     |
| N         | dNotch; EG:163A10.2; EG:140G11.1; facet; I(1)3Cb; fa; I(1)Ax; n<sup>fah</sup>; Abruptex; swb; split; Nintra; CT13012; N; spl; 1.1; Co; co; nd; clone 1.12; 16-178; anon-EST:Liang-1.12; Ax; Chp; notch; I(1)N; 16-55; CG3936; shd |
| Nap1      | NAP1; Nap1; dNAP-1; p56/dCAF-4; dNAP1; dNap1; CG5330; NAP-1; Nap-1                                                                                                                                                                |
| NC2alpha  | Drap1; NC2alpha; dDrap; dDrap1/dNC2a; NC2alpha; CG10318; dNC2                                                                                                                                                                     |
| NC2beta   | CG4185; BG:DS00929.3; dNC2; Dr1; NC2beta; NC2beta                                                                                                                                                                                 |
| neb       | sl(2)ry3; KLP-38B; DmKlp38B; CG10718; tio; sl(2)ry; I(2)03552; Mot; Klp38; I(2)k00802; klp38B; Klp38B; KLP38B; KLP 38B; neb; Neb; Dm0332; 38B.10; I(2)k07614; 38B.12; KIF14                                                       |
| nej       | CREB binding protein; dCBP; anon-WO0147981.11; CBP; Cbp; cbp; CG15319; CREB-binding protein; nej; dmCBP; CBP/p300; Crbp; p300/CBP                                                                                                 |
| Nelf-E    | anon-66Da; CG5994; cg5994; NELF-E; Nelf-E                                                                                                                                                                                         |
| nerfin-1  | nerfin-1; CG13906                                                                                                                                                                                                                 |
| net       | Group IId; Shout; shout; CG11450; net                                                                                                                                                                                             |
| Neu2      | Neu2; CG7204                                                                                                                                                                                                                      |
| NFAT      | MESR1; EP1335; NFAT; NF-AT5; dNFAT; Drosophila TonEBP; CG11172; NFAT5                                                                                                                                                             |

**Table S2 / 15**

|                     |                                                                                                                                                                                                                                  |
|---------------------|----------------------------------------------------------------------------------------------------------------------------------------------------------------------------------------------------------------------------------|
| nht                 | CG15259; TFIID; dmTAF4b; BG:DS07851.6; dTAF<down>II</down>110; nht; nohitter; no hitter                                                                                                                                          |
| NK7.1               | CG8524; NK7.1                                                                                                                                                                                                                    |
| noc                 | noc; nocA; Sco; I(2)br22; I35Ba; BG:DS04641.1; br22; I(2)35Ba; I(2)35Ba/nocA; Scutoid; CG4491; I(2)br29; br29                                                                                                                    |
| nonA                | Bj6-1; no-on transient A; Bj6; CG4211; diss; non-A; nonA; NonA; x14; no-on-transient A; Positive spike II group; opm2; nonA/diss                                                                                                 |
| nonA-l              | LD09360; no-on transient A-like; nonA-l; CG10328; BEST:LD09360; Z; nonA-1; nonA 1; no-on transient A                                                                                                                             |
| nub                 | Pdm; pdm; dPOU19; Oct-1; nub; dPOU-19; nb; POU33F1; pdm1; Pdm1; twm; dOct1; CG6246; dPOU-19/pdm-1; POU domain protein 1; Pdm-1; pdm-1                                                                                            |
| Nurf-38             | NURF-38; Nurf-38; I(2)k16102; NURF38; 38; CG4634; p38; NURF; p38/NURF-38; dNURF                                                                                                                                                  |
| Nut2                | dTRAP15; NUT2; Nut2; CG5057; BcDNA:SD24044                                                                                                                                                                                       |
| oc                  | I(1)7Ff; oc; Orthodenticle; orthodenticle; uvi; ort; CG12154; CG7411; Otd; otd; I(1)8Ac                                                                                                                                          |
| okr                 | RAD54; Rad54; rad54; DmRAD54; DmRad54; DhR54; okr; CG3736                                                                                                                                                                        |
| onecut              | CG1922; A1; onecut; D-onecut                                                                                                                                                                                                     |
| Optix               | D-Six3; CG18455; Dsix3; opt; Optix; optix; Six3                                                                                                                                                                                  |
| osa                 | CG7467; Osa; osa; p300; eld; I(3)04539; E(E2F)3C; I(3)j9C3; I(3)00090; eyelid; eye lid; en(lz)4F/4H                                                                                                                              |
| p53                 | Dm-P53; prac; p53; CG31325; dmp53; Dmp53; dp53; CG33336; CG10873                                                                                                                                                                 |
| Parp                | PARP-1; CG17718; PARP; Parp; CG40411; CG17685; D.PARP; CG17696; poly(ADP-ribose) polymerase                                                                                                                                      |
| Pc                  | CG7618; CG32443; Pc; DmPc; dPC; Pc-G                                                                                                                                                                                             |
| Pcaf                | dGCN5; dGcn5; p/CAF; PCAF; Pcaf; Gcn5; gcn5; CG4107; dGCN5 HAT; dmHAG401; dPCAF; Gcn5/PCAF                                                                                                                                       |
| Pcl                 | CG5109; I(2)s1859; PCL; Pcl; pcl                                                                                                                                                                                                 |
| per                 | Clk; EG:155E2.4; dPER; CG2647; clk-6; dperiod; PER; Per; per                                                                                                                                                                     |
| ph-d                | CG3895; DROZFP; phm; PH; Ph; ph; ph<sup>D</sup>; ph-d; ph-D; PH-d; polyhomeotic; Polyhomeotic; phd; EG:BACN25G24.3                                                                                                               |
| ph-p                | PH-p; ph-P; ph-p; ph<sup>P</sup>; phm; php; ph; Ph; PH; CG18412; EG:87B1.5; CG18414; polyhomeotic; Polyhomeotic                                                                                                                  |
| phol                | CG3445; phol                                                                                                                                                                                                                     |
| pont                | pontin; 0229/05; CG4003; dpon; pont; Tip49/Pontin; Tip49; I(3)S022905; pon                                                                                                                                                       |
| Poxn                | pox neuro; Pox-n; pox-n; P4; Poxn; poxn; neuro; pox-neural; pox-neuro; Pox-neuro; CG8246                                                                                                                                         |
| ppa                 | I-55; Ppa; ppa; CG9952                                                                                                                                                                                                           |
| Pph13               | Mu; PPH13; Pph13; CG2819; Munster; 60Mun1                                                                                                                                                                                        |
| prod                | CG18608; I(2)k08810; PROD; Prod; prod; I(2)88/10                                                                                                                                                                                 |
| pros                | 0451/09; 1167/13; I(3)rl160; 0763/13; I(3)rK204; Pros; 0585/13; 0563/18; I(3)j6E2; I(3)rL433; CG17228; pro; 0320/10; I(3)j12C8; DMPROSPER; 0441/16; 1135/07; 0244/09; PROS-1; BcDNA:HL08040; 1135/09; PROS-2; pros; 0664/07; I(3 |
| Pros20S- $\alpha$ p | 20S proteasome; 20s proteasome; Pros20S-alpha3                                                                                                                                                                                   |
| Pros20S- $\alpha$ p | Pros20S-alpha3t; 20S proteasome; 20s proteasome                                                                                                                                                                                  |

**Table S2 / 16**

|            |                                                                                                                                                |
|------------|------------------------------------------------------------------------------------------------------------------------------------------------|
| Pros25     | PRC3; PROS-Dm25g; dalpha2; Pros25; 20S proteasome; 20s proteasome; PROS Dm25; alpha2_dm; CG5266; Proteosome                                    |
| Pros26     | DTS5; I(3)DTS5; beta6_dm; 20S proteasome; I(3)73Ai; Pros26-DTS; Pros26; I(3)DTS-5; DTS-5; Proteasome subunit 20S; CG4097                       |
| Pros26.4   | Dm_Rpt2; DmP26S4; CG5289; proteasome 26S; p56; dRpt2; 26S proteasome subunit 4 ATPase; Pros26.4; P26s4; S4                                     |
| Pros28.1   | 20S proteasome; 20s proteasome; a4; CG3422; PROS-28.1; PROSA-28.1; Pros-Dm28.1; PROS-Dm28.1; pros28.1; Pros28.1; Pros28; alpha4_dm             |
| Pros28.1A  | CG17268; alpha4t1_dm; 20S proteasome; 20s proteasome; testes-specific proteasome subunit; dalpha7; Pros28.1A; a4-t1                            |
| Pros28.1B  | CG4569; 20S proteasome; 20s proteasome; testes-specific proteasome subunit; alpha4t2_dm; dalpha7; a4-t2; Pros28.1B                             |
| Pros28.2   | 20S proteasome; Pros28.2                                                                                                                       |
| Pros29     | 20S proteasome; 20s proteasome; PROS-29; alpha3_dm; CG9327; Pros29; pros29                                                                     |
| Pros35     | PROS-35; PROS-Dm35; Pros-Dm35; alpha_dm; CG4904; 20S proteasome; 20s proteasome; Pros35; pros35                                                |
| Pros45     | CG1489; dRpt6; DUG; Dug; sug1; p42C; Ug; Dm_Rpt6a; Pros45; pros45; sug-1                                                                       |
| Pros54     | CG7619; p54; S5a; 54 kda mu particle subunit of 26S protease; mu-54; dRpn10; Pros54                                                            |
| Prosalpha3 | Prosalpha3T; CG1736; Prosalpha3T                                                                                                               |
| Prosalpha6 | Prosalpha1; 20S proteasome; 20s proteasome; 20S proteasome subunit alpha1; CG18495; Prosalpha6                                                 |
| Prosalpha6 | CG5648; Prosalpha6T; Prosalpha6T                                                                                                               |
| Prosalpha7 | Prosalpha7; CG1519; 20S proteasome; 20s proteasome; alpha7_dm; Prosalpha7; Proteasome alpha3 subunit                                           |
| Prosbeta2  | DTS7; I(3)DTS7; Prosbeta2; Prosbeta2; 20S proteasome; 20s proteasome; anon-EST:fe1E6; anon-EST:fe1G6; CG3329; beta2; beta2_dm; beta2_dm; DTS-7 |
| Prosbeta3  | Prosbeta3; Prosbeta3; 20S proteasome; 20s proteasome; 20S proteasome beta3 subunit; CG11981                                                    |
| Prosbeta5  | 20S proteasome; CG12323; dbeta5; Prosbeta5; Prosbeta5; LD08717                                                                                 |
| ProsMA5    | alpha5_dm; 20S proteasome; 20s proteasome; PSMA5; ProsMA5; prosMA5; PRCZ; CG10938                                                              |
| Psc        | I(2)49Ea; 49Ea; CG3886; I(2)Psc; Su(z)2-C; PSC; Psc; psc; D-Bmi; I(2)vr14; vr14                                                                |
| Pur-alpha  | PURalpha; pur-alpha; CG1507; Pur-alpha                                                                                                         |
| Rbf        | Rb; Rb1; EG:34F3.3; CG7413; rbf; Rbf; RbF; RBF; rbf1; Rbf1; RBF1; dRBF; FBF                                                                    |
| Rbf2       | CG5083; RBF2; Rbf2; rbf2                                                                                                                       |
| rec        | CG4828; rec-1; rec; CG14875; rec1; CG31293                                                                                                     |
| RecQ4      | DmRECQ4; CG7487; cg7487; RecQ4                                                                                                                 |
| RecQ5      | RECQ5; RecQ5; RECQE; DmRECQ5; Q1; RECQ5/QE; CG4879; Dm RECQ5/QE; DQ1; Dq1; anon-EST:Posey293                                                   |
| ref(2)P    | Ref(2)P; Ref(2)p; ref(2)P; ref(2)p; ref(2)Po2; CG10360; ref; ref(2)Pn; ref2p; Ref2P                                                            |
| REG        | CG1591; dREG; REG                                                                                                                              |
| Rel        | CG11992; ird4; I(3)neo36; Rel; rel; ird; relish                                                                                                |
| repo       | reverse polarity; AbRK2; CG8045(CT24072); CG31240; CT24072; REPO; repo; 3702; I(3)03702; rk2; RK2                                              |

**Table S2 / 17**

|           |                                                                                                                                                                                                                           |
|-----------|---------------------------------------------------------------------------------------------------------------------------------------------------------------------------------------------------------------------------|
| rept      | I(3)06945; Tip48; reptin; Tip48/Reptin; drep; rept; CG9750; rep                                                                                                                                                           |
| retn      | dead ringer; CG5403; retn/dri; retn; BcDNA:LD35748; I(2)02535; EY2-10; 2535; dri; Dri; DRI                                                                                                                                |
| RfC40     | I(3)SH17; I(3)64Ai; CG14999; rfc; rfc<sup>40</sup>; DRas2; Rfc40; RfC40; rfc4; I(3)rfc40                                                                                                                                  |
| Rfx       | RFX; Rfx; rfx; dRFX; dRfx; Regulatory factor X; CG6312                                                                                                                                                                    |
| Rga       | I(3)03834; Rga; CG2161                                                                                                                                                                                                    |
| rhi       | rhi; CG10683; rno                                                                                                                                                                                                         |
| rno       | CG7036; rno                                                                                                                                                                                                               |
| ro        | ro; CG6348                                                                                                                                                                                                                |
| Roc1a     | Rbx1/Roc; CK01110; dRbx1; EG:115C2.11; CG16982; ROC1; Roc1a; BEST:CK01110; dRoc1a; Rbx1                                                                                                                                   |
| Roc1b     | CG16988; BcDNA:AT21612; dRoc1b; ROC2; ROC1B; Roc1b                                                                                                                                                                        |
| Roc2      | dRoc2; BcDNA:RE61847; CG8998; Roc2                                                                                                                                                                                        |
| Rpb10     | RPB10; Rpb10; BcDNA:SD08670; CG13628                                                                                                                                                                                      |
| Rpb11     | BcDNA:GM15177; CG6840; RPB11; Rpb11                                                                                                                                                                                       |
| Rpb4      | RPB4; Rpb4; CG31237; CG7150                                                                                                                                                                                               |
| Rpb5      | RPB5; Rpb5; CG11979                                                                                                                                                                                                       |
| Rpb7      | CG31155; RPB7; Rpb7; CG6572                                                                                                                                                                                               |
| Rpb8      | CG11246; RPB8; Rpb8                                                                                                                                                                                                       |
| Rpd3      | I(3)64Cc; HDAC1; Hdac1; dHDAC1; E(var)3-64BC; HDAC-1; HDAC; dHDAC-1; DmHDAC1; dmHDA401; I(3)04556; Rpd3/HDAC; RPD3; Rpd3; rpd3; CG7471; Su(var)326; dRpd3; dRPD3; Su(var)328                                              |
| Rpl1      | CG10122; RNA polymerase I; RPA1; Rpl1; DmRPA1                                                                                                                                                                             |
| Rpl12     | CG13418; Rpl12                                                                                                                                                                                                            |
| Rpl135    | I(2)k16513; RNA polymerase I; RP135; CG4033; DmRP135; Rpl135; RplII135                                                                                                                                                    |
| RplII140  | PolIIc; RNA Pol IIc; RNA polymerase subunit IIc; RNAP II; I(3)RplII140; DmRP140; RplII140; RPII140; RNA polymerase II second largest subunit; II; subunit IIc of RNA Pol II; RNA polymerase II; 150                       |
| RplII18   | RNAP II; RNA polymerase II; CG1163; Dm6; BcDNA:RH21608; RplII18; RpABC14; polII; Pol II; H5; RNApolII; RNA polII; RNA pol II; RNA Pol II                                                                                  |
| RplII215  | L5; RNAP II LS; RNAP II; Ubl; RNA polymerase II large subunit; POL; RplII215; I(1)L5; I(1)DC912; II; RplII215; I(1)10Ca; I(1)DF912; RplII; RNA polymerase II; 5; RPB1; CG1554; dRPB1; I(1)G0040; 8WG16; H5; polII; PolII; |
| RplII33   | RplII33; I(2)34Dg; CG7885; BG:DS00941.10; I(2)br17; RNA polymerase II; RPB3; RplII33; rplII33; I(2)k05605; br17; polII; Pol II; RNA Pol II; RNA pol II; RNA polII; I34Dg                                                  |
| RplIII128 | RplIII128; CG8344; RNA polymerase III; RP128; DmRP128; RNA polymerase IIIb                                                                                                                                                |
| Rpn1      | CG7762; p97; BcDNA:LD21723; Rpn1                                                                                                                                                                                          |
| Rpn11     | Rpn11; p37B; CG18174; yip5                                                                                                                                                                                                |
| Rpn12     | CG4157; p30; Rpn12; dRpn12                                                                                                                                                                                                |
| Rpn2      | p110; Rpn2; CG11888; dRpn2                                                                                                                                                                                                |
| Rpn5      | p55; CG1100; Rpn5                                                                                                                                                                                                         |
| Rpn6      | BcDNA:LD18931; p42B; CG10149; BcDNA.LD18931; I(2)k00103; Rpn6; Pros44.5                                                                                                                                                   |
| Rpn7      | CG5378; p42A; Rpn7                                                                                                                                                                                                        |

**Table S2 / 18**

|       |                                                                                                                                                                                                              |
|-------|--------------------------------------------------------------------------------------------------------------------------------------------------------------------------------------------------------------|
| Rpn9  | CG10230; Rpn4; 0718/06; 718/06; rpn9; Rpn9; l(3)S071806; Nobody; l(3)S071806b; Rpn94; p39A                                                                                                                   |
| Rpt1  | l(2)05643; CG1341; dRpt1; p48B; Dm_Rpt1; Dmp48B; l(2)43Ed; Rpt1                                                                                                                                              |
| Rpt3  | CG16916; Rpt3; Dm_Rpt3a; l(1)G0052; p48A; Dmp48A                                                                                                                                                             |
| Rpt4  | l(1)G0227; l(1)G0345; p42D; Rpt4; CG3455; Dm_Rpt4a; Dmp42D; l(1)G0114; Dm_Rpt4b                                                                                                                              |
| Rtf1  | CG10955; dRtf1                                                                                                                                                                                               |
| run   | CG1849; 1; 2; LB5; l(1)B2/13.1; l(1)LB9; run; l(1)AA33; AA33; leg; Runt; P235; l(1)19Ea; ILB5                                                                                                                |
| SA    | DSA; ESTS:92H2T; SA; SCC3; DmSA; CG3423                                                                                                                                                                      |
| salm  | Sal; sal; salll; SPALT; Spalt; spalt; sal major; l(2)03602; spalt-major; 3602; salm; salM; SalM; CG6464                                                                                                      |
| sc    | sisterless-b; scalpha; sis b; sisB; sisb; AS-C T4sc; l(1)1Ba; Sc; sc; scute/sisterlessB; T4; achaete-scute; AS-C T4; T4 AS-C; sc/T4; CG3827; DROACS2; EG:198A6.1; sis-b; ascT4; Hairy-wing; Hw; scute alpha  |
| SC35  | CG5442; cg5442; CG5542; dSC35; SC35                                                                                                                                                                          |
| Scm   | l(3)85Ef; Su(z)302; SCM; Scm; scm; Sex combs on midleg; CG9495                                                                                                                                               |
| scro  | CG17594; scrou; CG18452; scro                                                                                                                                                                                |
| SF1   | CG5836; cg5836; SF1; dSF1; p70                                                                                                                                                                               |
| shn   | Shn; shn; l(2)04738; quo; CG7734                                                                                                                                                                             |
| sim   | CG7771; single-minded; 0716/08; l(3)87Ea; l(3)RD; 0483/09; 0953/08; 1479/04; shm; sim; SIM; l(3)E320; schm; S8; 0899/14; 1002/10; single-minded; 1111/10; 1110/04; 1034/02; 1050/13; l(3)S8; l(3)s8; 1330/08 |
| sima  | CG7951; SIMA; Sima; sima; DMU43090; Hif-1A                                                                                                                                                                   |
| Sin3A | CG8815; l(2)k09715; dSin3; dSin3A; 97/15; ES2-3; 27/3; ESTS:159A11T; ld; 159A11T; l(2)k02703; EY2-9; l(2)08269; l(2)k05415; SIN3; Sin3; sin3; sni3; Sin 3A; Sin3A                                            |
| Sir2  | SIR2; Sir2; D.mel1; BEST:LD38188; dmSRT406; dSIR2; dSir2; dsir2; CG5216; l(2)05326                                                                                                                           |
| Sirt2 | dSIRT2; D.mel2; CG5085; Sirt2                                                                                                                                                                                |
| Sirt4 | dSIRT4; D.mel3; CG3187; dmSRT407; Sirt4                                                                                                                                                                      |
| Sirt6 | Sirt6; D.mel4; dSIRT6; CG6284; dmSRT408                                                                                                                                                                      |
| Sirt7 | Sirt7; CG11305; D.mel5; dSIRT7; dmSRT409                                                                                                                                                                     |
| Six4  | Six4; D-Six4; Dsix4; CG3871; myotonin                                                                                                                                                                        |
| skd   | SPH203; bls; Pap; pap; pap/dTRAP240; flytrap; skd; CG9936; poils aux pattes; Pap/Trap; l(3)rK760; Scad78; l(3)L7062; TRAP240; blind spot; dTRAP240; Srb9/AMIB/PAP/TRAP240; bli; LD28662                      |
| skpA  | dSkp-1; l(1)G0058; dSkpA; dskpA; EG:115C2.4; CG16983; l(1)G0389; spkA; skpA; Skp1; l(1)G0109; l(1)G0037                                                                                                      |
| slbo  | slbo; fs(2)7; fs(2)8; C/EBP; CG4354; DmC/EBP; DC/EBP; fs(2)ry7; slobo; fs(2)ry8                                                                                                                              |
| slmb  | l(3)00295; shv; CG3412; Slimb; slimb; pingiel; crd; shiva; BcDNA:GM02031; ica; slmb                                                                                                                          |
| slou  | S59; s59; slou; NK-1; S59/NK-1; NK1; Nk1; NK1/S59; CG6534; slou/NK1; S-59; PRD                                                                                                                               |



**Table S2 / 19**

|           |                                                                                                                                                                                                                              |
|-----------|------------------------------------------------------------------------------------------------------------------------------------------------------------------------------------------------------------------------------|
| slp1      | FD6; slp1; Dmslp1; CG16738; l(2)05965; sloppy-paired; sloppy-paired 1; slp-1; Slp-1; slp-2; slp; Slp                                                                                                                         |
| slp2      | CG2939; FD7; slp2; Dmslp2; sloppy-paired 2; slp                                                                                                                                                                              |
| SMC1      | CG6057; SMC1; DmSMC1                                                                                                                                                                                                         |
| SMC2      | CG10212; SMC2; DmSMC2                                                                                                                                                                                                        |
| Smox      | tmp; l(1)G0348; CG2262; Smad2; smad2; Smox; smox; sad; Sad; DSMAD2; dSMAD2; dSmad2; ted                                                                                                                                      |
| Smr       | CG4013; Smr; E52; SMRTER; Smrter; l(1)G0361                                                                                                                                                                                  |
| sna       | CG3956; sn; sna; l35Db; BG:DS01845.1; l(2)br28; l(2)35Db; l(3)br28; br28                                                                                                                                                     |
| Snr1      | snr; BAP45; SNR1; Snr1; snr1; CG1064; l(3)01319                                                                                                                                                                              |
| so        | CG11121; Drl; mda; So; so; somda; med; ami; old                                                                                                                                                                              |
| sob       | org1; sob; CG3242                                                                                                                                                                                                            |
| Sox100B   | Sox9; CG18674; SoxB; CG15552; Sox100B; SOX100B; CG12098; SOXE                                                                                                                                                                |
| Sox14     | DSox-14; Dsox-14; SOX60B; DSox14; CG17263; SOXC; CG3090; DSox60B; SOX14; Sox14                                                                                                                                               |
| Sox15     | Sox F; SOX15; Sox15; SOXF; DSox-15; Dsox-15; SOX50E; Sox50E; CG8404; SoxE                                                                                                                                                    |
| Sox21b    | CG32139; sox-like; CG13483; Sox B2-2; CG6419; SOXB2.2; SoxB2.2; Sox21b                                                                                                                                                       |
| SoxN      | SoxN; soxN; CG18024; SOX29F; soxneuro; Sox B1; SOXB1                                                                                                                                                                         |
| Sp1       | Sp1; CG1343; D-Sp1; D.Sp1                                                                                                                                                                                                    |
| spen      | E(Sev-CycE)2A; EK2-9; spe; E(Raf)2A; l(2)03350; l(2)k07612; poc; yip1; EY2-7; rhinoceros; l(2)k06805; l(2)k08102; BcDNA:GM01870; E(E2F)2A; spen; 136/24; CG18497; En(yan <sup>ACT</sup> )2-7; rno                            |
| spn-E     | Homeless; homeless; fs(1)hls; spn-E; fs(3)hls; Spindle E; spn E; spnE; hls; spn-E/hls; CG3158                                                                                                                                |
| Spt3      | TFIID; SPT3; Spt3; CG3169                                                                                                                                                                                                    |
| spt4      | CG12372; l(2)k05316; SPT4; spt4; Dspt4                                                                                                                                                                                       |
| Spt5      | Dspt5; dSpt5; Spt5; DSIF; CG7626                                                                                                                                                                                             |
| Spt6      | Dspt6; dSpt6; spt 6; SPT6; Spt6; spt6; CG12225; l(1)G0063                                                                                                                                                                    |
| sqd       | l(3)EP3631; CG17791; Hrb87Fb; RRM3; rrm3; Squid; hnRNP 1; Rbp3; sqd; l(3)j6E3; fs(3)00048; CG16901; Hrb87; hrp40; Hrp40; HRP40                                                                                               |
| sr        | l(3)06948; CG7847; l(3)06948b; Sr; sr; l(3)03999; Stripe                                                                                                                                                                     |
| srp       | DmGATAb; CG3992; dGATAb; l(3)01549; l(3)89B2; Srp; srp; A7.1; spt; ABF; Abf; abf; l(3)neo45; GATA; GATAb                                                                                                                     |
| Sry-delta | EH8; Sry-delta; CG17958; sry-delta; Sry-delta; serendipity delta; srydelta; Srydelta; sry delta; Sry delta; anon-EH8; sry                                                                                                    |
| Ssb-c31a  | C31A; p11; CG8396; Ssb-c31a                                                                                                                                                                                                  |
| Ssdp      | CG7187; Ssdp; ssdp; l(3)neo48                                                                                                                                                                                                |
| Ssl1      | CG11115; SSL1; Ssl1                                                                                                                                                                                                          |
| Ssrp      | SSRP; Ssrp; SSRP1; DssRP; dSSRP; dSSRP1; Cf5; CG4817                                                                                                                                                                         |
| Stat92E   | DSTAT; Dstat; dSTAT; SD-stat; dSTAT92E/marelle; marelle; D-stat/stat92E; l(3)j6C8; mrl; mrl; DSRC; stat92E; Stat92E; STAT92E; STAT 92E; D-STAT; D-Stat; D-stat; d-STAT; Dstat 92E; Dstat92E; DRODSRC; l(3)06346; mrl stat92E |
| stc       | BcDNA.LD22726; l(2)br33; l35Cb; br33; stc; BG:DS04929.4; l(2)35Cb; BcDNA:LD22726; Cf4; CG3647                                                                                                                                |

**Table S2 / 20**

|             |                                                                                                                                                                                                                              |
|-------------|------------------------------------------------------------------------------------------------------------------------------------------------------------------------------------------------------------------------------|
| stwl        | snw; stwl; alpha transcript; fs(3)02024; CG3836                                                                                                                                                                              |
| su(f)       | R9-18; EC235; l(1)G0393; lethal3Des; 19; 28; CG17170; 29; CstF-77; l(1)su(f); R-9-18; 3DES; l(1)EC235; su<sup>+</sup>-f; l(1)X1; l(1)20Eb; l(1)X3; l3DES; SU-f; su-f; 3-DES; l(1)R-9-18; l(1)3DES; su(f)                     |
| Su(H)       | CG3497; l(2)35Bh; Su(H); su(H); C; D; RBP-Jkappa; dRBP-JK; dRBP-Jk; br7; BG:DS00929.10; SuH; RBP-J<down>Kappa</down>; oss; dRBP-J<down>Kappa</down>; l(1)br7; FTZ-F2; l(2)br7; l(2)k07904; E(H)                              |
| su(Hw)      | Su(Hw); Su(hw); su(Hw); su(hw); CG8573; Su[Hw]                                                                                                                                                                               |
| su(s)       | su-s; EG:115C2.3; su-v; su(s); CG6222                                                                                                                                                                                        |
| Su(var)2-HP | HP2; Su(var)2-HP2; CG12864                                                                                                                                                                                                   |
| Su(var)205  | Su(var); HP1alpha; Suvar2-5; Su(var)<sup>205</sup>; Su(var)2-05; DmHP-1; HP1; Hp1; Suvar(2)5; E(var)29; HP1a; E(var)29A; dHP1; Su(var)29A; heterochromatin-binding protein; Su-var(2)5; Su(var)2-5; Su(Var)2-5; HP-1; Su(var |
| Su(var)3-7  | l(3)87E1; CG8599; Su(var)(3)3; SU(VAR)3-7; Su(var)3-7; Su-var(3)7; Suvar(3)7; Su(var)(3)7                                                                                                                                    |
| Su(var)3-9  | CG6476; SUV39H1; dIF2; eIF2gamma; SUV39; eIF2G; Suvar(3)9; eIF-2gamma; Su(var)310; eIF-2G; Su(Var)3-9; Su(var)3-9; Su(var)306; Su-var(3)9; Su(var)3-902; Su-var(3)902; caa56376 Suvar39 Dm; Su(var)328                       |
| Su(z)2      | Su(z)<down>2</down>; Arp; CG3905; l(2)k06344; SUZ2; Su(z)2; su(z)2                                                                                                                                                           |
| sug         | CG3850; sugarbabe; sug                                                                                                                                                                                                       |
| SuUR        | CG7869; Su(UR); Su(UR)ES; SuUR                                                                                                                                                                                               |
| sv          | spa; l(4)40; pax2/sparkling; Cat; Pax258; CG11049; sv; spa-sv; Pax2; sparkling; Sparkling; pol; D-Pax2; D-pax2; d-Pax2; DPax-2; Dpax-2; dPax258; en(lz)4G/l; dPax2; shaven/sparkling                                         |
| Taf1        | cell; TAF<down>II</down>; TFIID TAF250; TAFII250; CG17603; TAF1; Taf1; TFIID; Taf230; TAF230; Taf250; TAF250; cel; TAF250/230; d230; dTAF<down>II</down>230; SR3-5; dTAF<down>II</down>250; BG:DS00004.13; p230; dmTAF<down> |
| Taf10       | TAF<down>II</down>; TFIID; Taf24; taf24; CG2859; BcDNA:RE73934; TafII24; TAF<down>II</down>24; dTAFII24; dtafII24; dTAF<down>II</down>24; Taf10; TAF10                                                                       |
| Taf10b      | TAF<down>II</down>; TFIID; Taf16; TAFII16; TafII16; TAF<down>II</down>16; dtafII16; dTAF<down>II</down>16; CG3069; Taf10b; TAF10b                                                                                            |
| Taf11       | TAF<down>II</down>; TAF30b; d30beta; dTAF<down>II</down>30beta; dTAF<down>II</down>30; TFIID; dTAFII30beta; dTAFII30 beta; TFIID-p28beta; dTAFII30; TFIID 28 beta; TAF<sup>II</sup>30beta; Taf30beta; TAF11; Taf             |
| Taf12       | TAF<down>II</down>; Taf32; dTAF<down>II</down>30alpha; dTAF22; dTAF28; TFIID; dTAFII30; p22; TFIID 22; dTAF<down>II</down>30alpha/22; TAF<sup>II</sup>30alpha; p28; TFIID 28; TAF<down>II</down>30alpha/28 TAF<down>         |
| Taf12L      | rye; TAF<down>II</down>; TFIID; dmTAF12b; dTAF<down>II</down>30alpha-2; ryan express; Taf30alpha-2; TAF30alpha-2; dTAF<down>II</down>30a; Taf12L; CG15632; dmTAF12L                                                          |
| Taf13       | TAF<down>II</down>; TFIID; 38B.15; TAF18; Taf18; TAF<down>II</down>18; CG10756; dTAF<down>II</down>18; Taf13; TAF13                                                                                                          |

**Table S2 / 21**

|            |                                                                                                                                                                                                                           |
|------------|---------------------------------------------------------------------------------------------------------------------------------------------------------------------------------------------------------------------------|
| Taf2       | TAF<down>II</down>; TAFII150; TafII150; dTAF II 150; dTAFII150; Taf2; TAF2; TFIID; TAF<up>II</up>150; Taf150; TAF150; dTAF150; Taf<down>II</down>150; TAF<down>II</down>150; CG6711; dTAF<down>II</down>150               |
| Taf4       | TAF<down>II</down>; p110; TFIID 110; dTAFII110; I(3)72Dj; SY3-2 TAF110; TAF<up>II</up>110; taf110; Taf110; TAF110; Taf4; TAF4; TFIID; Taf<down>II</down>110; TAF<down>II</down>110; d110; dTAF<down>II</down>110; SR3-3   |
| Taf5       | TAF<down>II</down>; TAF80; Taf80; TAF<down>II</down>80/85; TAF<down>II</down>80; Taf<down>II</down>80; Taf85; d80; dTAF<down>II</down>80; TFIID; Taf5; TAF5; TAFII80; dTAFii80; CG7704; TFIID 85; p85; dTAFII85           |
| Taf6       | TAF<down>II</down>; TAF60; Taf60; taf60; CG9348; CG32211; Taf62; TAF<down>II</down>60; Taf<down>II</down>60; dTAF62; TAF<down>II</down>62; d60; dTAF<down>II</down>60; dTAF<down>II</down>62; TAFII60(62); TFIID; Taf6; T |
| Taf6L      | TAF<down>II</down>; TAF60-2; Taf60-2; TFIID; CG10390; dTAF<down>II</down>60-2; Taf6L; TAF6L                                                                                                                               |
| Taf7       | TAF<down>II</down>; TFIID; TAF7; Taf7; E; TAF55; Taf55; CG2670; anon-84Ec; dTAF<down>II</down>55                                                                                                                          |
| tai        | I(2)k05809; DAIB1; EP(2)2630; CG18494; CG13109; I(2)k05802; I(2)01351; Taiman; 58/2; tai                                                                                                                                  |
| Tbp        | TFIID; TfiID; TBP38; dTFIID; 42kDa polypeptide; CG9874; TBP; Tbp; dTBP; dTbp; TFIIDtau                                                                                                                                    |
| Tbp-1      | BcDNA:GH12068; Tbp-1; CG10370; DmTBP-1; p50; BcDNA.GH12068; I(3)04210; Tbp1; Pros26S-RS6A; Rpt5; Dm_Rpt5a; Dm_Rpt5b; Pros26S; dRpt5                                                                                       |
| TBPH       | dtar; TBPH; CG10327                                                                                                                                                                                                       |
| Tfb1       | CG8151; Dmp62; I(2)06949; I(2)06950; TFB1; Tfb1                                                                                                                                                                           |
| Tfb2       | CG7764; TFB2; Tfb2                                                                                                                                                                                                        |
| Tfb4       | TFB4; Tfb4; CG5041                                                                                                                                                                                                        |
| TfIIA-L    | dTFIIA; CG5930; TFIIA; TFIIA-L; TfiIA-L                                                                                                                                                                                   |
| TfIIA-S    | dTFIIA; dTFIIA-S; BcDNA:RE44302; CG5163; F121; TfiIA-S; TFIIA-S; TFIIA                                                                                                                                                    |
| TfIIA-S-2  | TfIIA-S-2; TFIIA; CG11639; EG:BACR7A4.7                                                                                                                                                                                   |
| TfIIB      | dTFIIB; dTfiIB; CG5193; TFIIB; TfiIB; Tfiib                                                                                                                                                                               |
| TfIIEalpha | dTFIIEl; TFIIE; TfiIE; CG10415; TfiIEalpha; TFIIE-L; TfiIEalpha; TfiIEalpha; dTFIIE-L                                                                                                                                     |
| TfIIEbeta  | TFIIE; TfiIE; dTFIIE-S; dTFIIES; CG1276; E<down>S</down>; TfiIEbeta; TfiIEbeta                                                                                                                                            |
| TfIIFalpha | TFIIF; TfiIF; factor 5a; CG10281; TfiIFalpha; TFIIF-L; F5a; TfiIFalpha; TfiIFalpha; large subunit of transcription factor 5                                                                                               |
| TfIIFbeta  | CG6538; I(3)j3C1; TFIIF; TfiIF; TFIIF small subunit; RAP30; dTFIIF30; F<down>S</down>; TfiIFbeta; TfiIFbeta; TfiIFbeta                                                                                                    |
| TfIIS      | I(2)35Cf; I(2)35cF; TFIISA; DmS-II; CG3710; RnpSII; DmSII; I(2)br52; br52; TFS-II; I35Cf; BG:DS00929.12; TfiIS; TfiIS                                                                                                     |
| tgo        | Hif1; DARNT; dARNT; darnt; HIF-1beta; Tango; HIF1b; TGO; tgo; CG11987; PRD                                                                                                                                                |
| TH1        | CG9984; TH1; NELF-D                                                                                                                                                                                                       |
| Tif-IA     | TIF-IA; Tif-IA; CG16938; CG3278; CG5951                                                                                                                                                                                   |

**Table S2 / 22**

|             |                                                                                                                                                                                                                                  |
|-------------|----------------------------------------------------------------------------------------------------------------------------------------------------------------------------------------------------------------------------------|
| tin         | NK-4/msh-2; msh2; NK-4; DmNK-4; DROHOXHK4; NK4/msh-2; Tin; tin; NK4; CG7895; HOX; msh-2; tin/NK4                                                                                                                                 |
| tj          | Dmaf; CG10034; fs(2)eo2; tj; fs(2)eo-B; fs(2)eoPL3; PL3                                                                                                                                                                          |
| Top2        | CHRAC; type II DNA topoisomerase; CG10223; wind; Topo II; topo II; TOPOII; Topoll; topoll; dCHRAC; TOP2; Top2; top2; TopII; dTopoll; topoisomerase II; Topoisomerase II; type II topoisomerase                                   |
| tou         | tou; Dm Tou; anon-48Ad; CG10897; gene VI; VI                                                                                                                                                                                     |
| Trap100     | Trap100; CG7999; dTRAP100; dTrap100; Mediator                                                                                                                                                                                    |
| Trap150beta | dSUR2; CG3695; Gal11/SUR2; Trap150beta; SUR2; dTRAP150beta                                                                                                                                                                       |
| Trap170     | dRGR1; CG12031; dTRAP170; RGR1; p160; Trap170                                                                                                                                                                                    |
| Trap18      | Trap18; p36; SOH1; BcDNA:GM28912; dTRAP18; Mediator; CG1057; dSOH1                                                                                                                                                               |
| Trap19      | p18; Trap19; dSRB7; CG17397; dTRAP19; Mediator; SRB7                                                                                                                                                                             |
| Trap220     | CG7162; Trap220; Med1/SOP3/TRAP220; Mediator; dTRAP220; dTrap220                                                                                                                                                                 |
| Trap25      | dTRAP25; Med11/TRAP25; CG17183; Trap25                                                                                                                                                                                           |
| Trap36      | Trap36; CG8609; Med4/TRAP36; dp34; dTRAP36; Mediator; p34                                                                                                                                                                        |
| Trap37      | Trap37; dCRSP34; dTRAP37; CG1245; CRSP34                                                                                                                                                                                         |
| Trap80      | dTRAP80; dTrap80; Mediator; CG7957; p70; I(3)s2956; SRB4; dTRAP80/SRB4; Trap80; TRAP80                                                                                                                                           |
| Trap95      | dTRAP95; Sin4/TRAP95; Trap95; CG5465                                                                                                                                                                                             |
| Trf         | dTRF1; X70838; trf; Trf; TRF; Trf1; TRF1; CG7562                                                                                                                                                                                 |
| Trf2        | dTRF2; CG11195; CG18009; p79/TRF2; TLF; Trf2                                                                                                                                                                                     |
| Trfp        | dTrfp; CG18267; CG18780; I(2)28DE; dTrap26; Tmr; Srb2/TRFP; Mediator; p29; Trfp; TRFP                                                                                                                                            |
| trh         | I(3)10512; 3.1; CG6883; DMU42699; TRH; trh                                                                                                                                                                                       |
| Trl         | TfGAGA/Adf-2; anon-EST:fe2E12; E(var)62; transcription-factor-Adh2; CG13470; Adf-2; Gaf; GAF; Trl-GAGA; I(3)s2325; GAGA factor; Gaga; GAGA; E(var)3-trl; trl; Trl; Adf-2-519; Adf2; CG9343; NC70F; Nc70F; GAGA transcriptio      |
| trr         | trr; CG3848; EG:63B12.3; anon-2Bb                                                                                                                                                                                                |
| trx         | I(3)j3A2; Rg-bx; 4733; trx-g; I(3)s5452; I(3)j14A6; NR0A5; R-bx; DMTRXIII; trxl and trxII; 4720; I(3)bx<sup>v</sup>; CG8651; trx; Trx; TRX                                                                                       |
| tst         | Ski2; tst; CG10210; cg10210                                                                                                                                                                                                      |
| ttk         | 1209/05; 1325/15; 0438/31; ttk69; 1049/07; 1372/08; 5311; clone 2.9; ftzf2/ttk; ttkp69; E(yan)100D; ttk; I(3)02667; oversensitive; ovs; FTZ-F2; ftz-f2; 1209/10; 0250/25; 1119/04; 0037/17; Ttk69; TTK88; 1418/06; 1184/16; 1396 |
| Tudor-SN    | tudor staphylococcus/micrococcal nuclease; CG7008; Tudor-SN                                                                                                                                                                      |
| twi         | CG2956; EC9; dip5; twi; DTwist                                                                                                                                                                                                   |
| Uch-L3      | BcDNA:LD24440; UCH; p37A; BcDNA.LD24440; Uch-L3; uch-L3; CG3431; dUCH37; I(3)j2B8                                                                                                                                                |
| unpg        | unpg; unpg; upg; anon-45C; CG1650                                                                                                                                                                                                |
| Upf1        | Dm-Upf1; UPF1; Upf1; DmUpf1; CG1559                                                                                                                                                                                              |
| vas         | fs(2)ltoRJ36; BG:DS00929.14; no-relish; DmRH25; EP(2)0812; CG3506; vas; VAS; vasa; Vasa; VASA; cgt                                                                                                                               |
| vis         | vismay; vis; zaa; CG8821                                                                                                                                                                                                         |

**Table S2 / 23**

|          |                                                                                                                                                                                           |
|----------|-------------------------------------------------------------------------------------------------------------------------------------------------------------------------------------------|
| vnd      | l(1)1Bf; l(1)GA100; vnd; Vnd; VND; l(1)RC24; l(1)EA142; l(1)GA122; NK2; l(1)EC6; vnd/NK-2; l(1)VE769; ventral nerve cord defective; EG:118B3.1; NK-2; nk-2; CG6172; dNK-2; EC6; l(1)VA208 |
| vri      | vri; l(2)jf23; jf23; argo; CG14029; mat(2)earlyRS32; l(2)25Db; vrille; mat(2)ea-G                                                                                                         |
| vvl      | drifter; dfr-vvl; dfr/vvl; CG10037; Cfla; Cf1-a; vvl; VVL; PRD                                                                                                                            |
| wdn      | CG1454; pqp; Sryc; wdn; sry-h1; sry-c; sry h-l                                                                                                                                            |
| woc      | woc; CG5965                                                                                                                                                                               |
| wor      | wor; BG:DS03023.1; l35Da; l(2)br35; br35; CG4158; l(2)35Da; schnecke; warniu                                                                                                              |
| XNP      | xnp/atrx; XNP; CG4548                                                                                                                                                                     |
| Xpd      | DhXPD; DhR3; XPD/ERCC2; XPD; Xpd; CG9433; DmXPD                                                                                                                                           |
| yps      | p45; p57; YPS; Yps; yps; Ypsilon Schachtel; CG5654                                                                                                                                        |
| z        | e(bx); en-bx; z; CG7803; EG:BACH59J11.3                                                                                                                                                   |
| zen2     | BG:DS00276.10; z2; zpr; zerknüllt 2; CG1048; zen2                                                                                                                                         |
| zfh1     | Zfh1; zfh1; CG1322; zfl-1; l(3)00865; ZFH-1; Zfh-1; zfh-1                                                                                                                                 |
| zfh2     | zfh2; CG1449; ZFH-2; Zfh-2; zfh-2                                                                                                                                                         |
| Zfrp8    | l(2)k13705; Zfrp8; zfrp8; CG3260; 137/5                                                                                                                                                   |
| Zyx102EF | Lim102EF; DmLIM-1; lim; Zyxin; zyxin; DLim-1; CG32018; Zyx102EF; BcDNA:LD06023; zyx102; Zyx102; ZYX102                                                                                    |
